# Supplementary material
Source: publisher figshare collection journal article supplement (https://gsajournals.figshare.com/ndownloader/files/25721234)
Supplement: Supplementary file 1 [file 25721234]

## Sheet: Sheet1
Table S3. The expression level of the differentially expressed genes identified at the four time points
Gene_ID	Arabidopsis gene hit	Annotation	Time_point	log2FC	Adj_p_value	Mutant_0	Mutant_2	Mutant_4	Mutant_6	Normal_0	Normal_2	Normal_4	Normal_6
A01G0116	AT4G03420.1	Protein of unknown function (dUF789)	0dpa_up	2.30193	4.8639e-97	2388.7	1226.3	986	1178.3	511	267.7	280	363
A02G0749	AT1G77450.1	NAC domain containing protein 32	0dpa_up	1.05671	0.0207773	110.3	233	264	194.7	67.7	203.3	283	263
A02G1726		No Annotation	0dpa_up	1.15334	1.94982e-09	1771.3	1327.3	1507.7	1724	824.3	965	1471.7	1326.7
A05G0409	AT2G24280.1	alpha/beta-Hydrolases superfamily protein	0dpa_up	1.03709	0.00342594	127	5.7	0.3	11	77.7	3	0	51
A05G2408	AT3G54500.4	No annotation	0dpa_up	1.07674	0.00171726	399.7	196.7	150.7	81.3	249.7	194	110	84.7
A06G1690	AT5G63560.1	HXXXd-type acyl-transferase family protein	0dpa_up	1.28084	0.0482121	61.7	24	10.3	3.7	38.3	20.3	13.7	3.7
A08G2526	AT4G25650.2	ACd1-like	0dpa_up	1.30688	0.00054022	123.3	105.7	101	108	76	103.7	87.7	89.3
A09G0142	AT1G26800.1	RING/U-box superfamily protein	0dpa_up	1.83447	0.000209008	126.3	26.3	21.3	24.3	33.3	13	9.3	27
A10G2355		No Annotation	0dpa_up	2.83311	2.84255e-07	65.3	1.3	0.3	0	13.3	0.3	0	2.3
A11G0819	AT1G01580.1	ferric reduction oxidase 2	0dpa_up	1.21522	4.03814e-07	217.7	125	38.7	36.3	142.3	89	53.7	35.7
A12G2681	AT4G11350.2	Protein of unknown function (dUF604)	0dpa_up	1.26655	0.00808743	92.3	60.3	35	44.3	48.7	51.7	31	48
A13G0794	AT1G08810.1	myb domain protein 60	0dpa_up	3.24777	7.77071e-10	100.7	141.7	91	96	10.7	110	90.7	85.3
D03G0583	AT3G16240.1	delta tonoplast integral protein	0dpa_up	1.53608	0.0147865	63	53.7	50.7	77.7	28.7	70.7	32.3	50.3
D03G1574	AT5G17970.1	disease resistance protein (TIR-NBS-LRR class) family	0dpa_up	1.34603	0.0165318	63	23	13.7	28.3	37	17	13	21.3
D05G0972	AT5G60660.1	plasma membrane intrinsic protein 2;4	0dpa_up	2.16355	1.3292e-05	84	32.3	84.3	141.7	24.7	34	47.7	63.3
D05G1068	AT4G20800.1	FAd-binding Berberine family protein	0dpa_up	2.06388	7.09356e-08	88.3	217.3	281.7	252	25.7	232.3	164	150.3
D05G2687	AT3G54400.1	Eukaryotic aspartyl protease family protein	0dpa_up	1.17292	0.00203787	118.3	211	212.7	141.7	70.3	158.3	150	151
D05G2696		No Annotation	0dpa_up	2.26901	4.67712e-07	82.3	8.7	20	8.3	39.3	12	5.7	6
D06G0982	AT2G25810.1	tonoplast intrinsic protein 4;1	0dpa_up	1.09297	0.0179649	107.3	81.7	63	74.7	54.3	68.3	62	71
D06G1608	AT4G27070.1	tryptophan synthase beta-subunit 2	0dpa_up	1.05104	0.0456698	92.3	37.7	42.3	50	59.3	22	42	40
D07G0614	AT3G10113.1	Homeodomain-like superfamily protein	0dpa_up	1.17017	0.000154421	144.3	43	71.7	95.3	99.7	36	44	84
D09G0135	AT1G26800.1	RING/U-box superfamily protein	0dpa_up	1.58066	1.46483e-09	201.7	75.3	48.3	51	76	59.7	38.3	53.7
D09G0136	AT1G26800.1	RING/U-box superfamily protein	0dpa_up	2.00267	4.90762e-05	71.3	40.3	21	22.3	19.3	28.7	22.3	22.3
D09G2161	AT5G43630.1	zinc knuckle (CCHC-type) family protein	0dpa_up	1.00802	0.0469199	90	90.3	122.7	82.7	76.3	104.3	133	103.3
D10G0369	AT2G34420.1	photosystem II light harvesting complex gene B1B2	0dpa_up	1.43529	0.0416477	76	22.7	22	12.7	38.7	34.3	21.7	18.3
D10G0541	AT1G72790.1	hydroxyproline-rich glycoprotein family protein	0dpa_up	1.04991	0.039428	102.3	54	33.7	46.3	65.7	40.3	32	52.3
D10G2360	AT4G00430.1	plasma membrane intrinsic protein 1;4	0dpa_up	1.26102	0.0193736	85	64.3	77.7	180	54	47	62	91.7
D11G2233	AT5G47030.1	ATPase, F1 complex, delta/epsilon subunit	0dpa_up	1.72034	0.000466423	118.7	75.3	101.7	47.7	37	43.7	37.7	43.3
D12G1175	AT4G01400.3	No annotation	0dpa_up	1.22982	0.034532	83	130	114.3	104.7	47.3	83	95	75.3
D13G0096		No Annotation	0dpa_up	1.9051	6.74311e-10	282	584	490.3	411.3	72.3	99.3	52.3	62.3
D13G0137		No Annotation	0dpa_up	1.05675	7.27051e-15	1965	1371.3	1183	1169.3	976	690.7	658.7	742
D13G0139	AT3G10985.1	senescence associated gene 20	0dpa_up	7.66965	0	13003	10106	7508	6640.7	71.3	51.7	39.7	38
D13G0152		No Annotation	0dpa_up	2.31875	3.63629e-20	230	401	417.7	425.3	51	89.7	75	105.3
D13G1287	AT2G28010.1	Eukaryotic aspartyl protease family protein	0dpa_up	1.35715	1.53526e-07	254	99.7	56.3	28	143.7	54	37.3	21
Sca032219G01	ATMG00980.1	Ribosomal protein S12/S23 family protein	0dpa_up	1.36311	8.50271e-24	2953	2349.3	2875	2521.3	1717.7	2763.7	2086.3	1973
A01G0009	AT3G12110.1	actin-11	0dpa-down	-1.55653	0.00325774	53.7	42	30	51	88.7	22	38	43
A01G0046	AT1G75250.2	RAd-like 6	0dpa-down	-1.4305	8.25322e-07	1518	245	15.3	16	1814.7	34.7	14	15.7
A01G0085		No Annotation	0dpa-down	-1.37271	0.00203787	72	91.3	32	17	92	45	44.3	39.7
A01G0588	AT3G21710.2	No annotation	0dpa-down	-1.7663	0.00172978	137	35.7	1	5.3	169.3	5.7	1.7	0.7
A01G0649	AT5G55180.2	O-Glycosyl hydrolases family 17 protein	0dpa-down	-1.15462	0.0408448	61	19	1.7	1	81	7	0.7	3.7
A01G1605	AT1G77120.1	alcohol dehydrogenase 1	0dpa-down	-1.25747	7.61695e-08	286.7	320.3	269.3	695	398	306.7	513.3	1028.3
A02G0294	AT3G22400.1	PLAT/LH2 domain-containing lipoxygenase family protein	0dpa-down	-2.0148	2.5194e-05	35.3	38	35.7	52	78.3	27	26.3	44.7
A02G1262	AT3G43220.2	Phosphoinositide phosphatase family protein	0dpa-down	-1.57686	9.425e-08	540.7	186.3	3	2.3	720.7	94.3	5.7	2.3
A03G0405		No Annotation	0dpa-down	-1.28331	6.06327e-15	352.7	413.7	713	652.3	492.3	409	1046.7	931.7
A03G0420	AT2G29630.3	thiaminC	0dpa-down	-1.18147	1.8947e-09	299.7	445.3	379	291.7	464	449.7	526.7	411.7
A03G1095		No Annotation	0dpa-down	-1.07129	0.0169433	129	35.7	9	7.3	144.7	13.3	16.7	11.7
A03G1650	AT1G49750.1	Leucine-rich repeat (LRR) family protein	0dpa-down	-1.27757	1.79843e-08	526.7	275.7	164.3	174.7	658.7	209	168	154.7
A04G0090		No Annotation	0dpa-down	-1.08941	0.0145279	52.7	61	36.7	19.7	120.7	51.7	38.3	45
A04G0836	AT1G69870.1	nitrate transporter 1.7	0dpa-down	-1.56344	1.08572e-14	430.7	461	601	1455	621	392.7	430.3	1026.3
A04G0861	AT5G13170.1	senescence-associated gene 29	0dpa-down	-1.35714	2.43997e-05	99.7	476.7	1049	1081	145	535	1177.7	1455.7
A05G0390	AT5G25610.1	BURP domain-containing protein	0dpa-down	-1.55683	4.2642e-10	3190.3	1374.7	174	103	4040.7	604.3	249.7	260
A05G0509	AT5G10770.1	Eukaryotic aspartyl protease family protein	0dpa-down	-1.19011	8.36115e-06	643.3	373	151	181	704.7	280.7	218	507
A05G0776	AT5G59190.1	subtilase family protein	0dpa-down	-2.33943	2.40869e-08	151	31.3	0	0	209.7	0	0	1
A05G1432	AT5G54770.1	thiazole biosynthetic enzyme, chloroplast (ARA6) (THI1) (THI4)	0dpa-down	-1.79015	1.8508e-29	713	976.7	480.7	145.7	1289.3	799.7	791.7	182.3
A05G1492	AT1G62380.1	ACC oxidase 2	0dpa-down	-1.55894	1.85967e-09	212.7	168.7	92.7	102.7	337.7	111	77.7	310.7
A05G1606	AT5G10990.1	SAUR-like auxin-responsive protein family	0dpa-down	-1.29107	0.0293163	40.7	54	72.3	197	66	53.3	65.7	141
A05G1689	AT1G75050.1	Pathogenesis-related thaumatin superfamily protein	0dpa-down	-1.41512	0.000593712	91	23	0.3	0	124	9.3	1	0.7
A05G2102	AT1G52190.1	Major facilitator superfamily protein	0dpa-down	-1.47215	0.021307	47.7	8.7	0.3	6	49.7	1.3	0.3	0.3
A05G3140		No Annotation	0dpa-down	-1.94405	3.06948e-09	1223.3	1141.3	204	243.7	1588.3	495.7	224.7	318.7
A05G3400	AT5G08640.2	flavonol synthase 1	0dpa-down	-1.48047	6.017e-05	422	130.3	7.7	13	447.3	22.3	5.3	20.3
A05G3754	AT4G08300.1	nodulin MtN21 /EamA-like transporter family protein	0dpa-down	-1.87014	1.90181e-07	88.7	31.3	79.3	682	155.7	22.3	58.3	847
A06G1356		No Annotation	0dpa-down	-1.75218	1.0872e-10	1795.3	949.3	10689.3	19912.7	2367.7	616.3	9565.7	13798
A06G1545	AT3G05820.1	invertase H	0dpa-down	-1.40196	4.03814e-07	120	142	143.7	120	225.3	154.7	150.7	179.3
A06G1638	AT1G52700.1	alpha/beta-Hydrolases superfamily protein	0dpa-down	-1.12971	0.00021268	148.3	89	48	47.3	195.7	84.7	58.7	48.7
A06G1641	AT4G32510.1	HCO3- transporter family	0dpa-down	-2.8074	1.28481e-08	43.7	11.3	1.3	0.7	137.7	4	0.7	0.7
A06G1806	AT2G33775.1	ralf-like 19	0dpa-down	-1.88346	1.79802e-05	153	70.7	10	2.3	180	33	8.3	3.7
A06G1807		No Annotation	0dpa-down	-2.10227	2.83586e-05	55	40.3	72.3	95	92.7	28.7	87.3	70.7
A06G1853	AT5G42900.3	cold regulated gene 27	0dpa-down	-1.42242	0.00949171	44.7	89.3	57.3	44.3	91	87.7	91	93.7
A07G0774	AT1G05010.1	ethylene-forming enzyme	0dpa-down	-1.016	0.000896517	329.3	161.7	78.3	142.3	363	102.3	64	108.7
A07G0940	AT1G59870.1	ABC-2 and Plant PdR ABC-type transporter family protein	0dpa-down	-1.66838	0.00286003	54.3	19	11.7	35	90	21.7	11	31.3
A07G1877	AT3G28917.1	mini zinc finger 2	0dpa-down	-2.97557	1.64893e-08	34	9.7	1.7	3	61.7	0.7	1.7	6
A07G2031	AT5G40348.2	other RNA	0dpa-down	-1.49467	0.00504353	55.7	6.7	0	0	104.7	0	0	0
A08G0550	AT3G60420.2	Phosphoglycerate mutase family protein	0dpa-down	-2.15868	0.0202378	12.3	19.3	13.3	0	75	79.3	29.7	92
A08G0999	AT3G61490.3	Pectin lyase-like superfamily protein	0dpa-down	-1.71749	8.07744e-05	62.3	23.3	9.3	62	101	17.7	11.3	323.3
A09G0263	AT3G27809.1	No annotation	0dpa-down	-1.79678	2.6195e-05	87.3	23.3	0	0	142	1.7	0.3	0
A09G0410	AT5G23950.1	Calcium-dependent lipid-binding (CaLB domain) family protein	0dpa-down	-1.2855	0.0249546	82.3	40.7	33	67.7	114.3	33	23.3	42
A09G0477	AT1G18400.1	BR enhanced expression 1	0dpa-down	-1.58897	1.54291e-06	164.7	39.3	2	0.3	200.7	12.7	2	0.3
A09G0945	AT1G63980.2	d111/G-patch domain-containing protein	0dpa-down	-1.44985	3.65773e-10	207	268.3	95.3	106.3	307	200.7	82.3	117.3
A09G1094	AT1G71870.1	MATE efflux family protein	0dpa-down	-2.09233	0.000160136	30	75	42.7	101.7	54.7	68	29.7	93
A09G1528	AT2G38110.1	glycerol-3-phosphate acyltransferase 6	0dpa-down	-1.89796	2.39416e-06	83	41.7	21.3	25	115.3	28.7	12	20.3
A09G1589	AT1G25330.1	basic helix-loop-helix (bHLH) dNA-binding superfamily protein	0dpa-down	-1.95657	3.83031e-08	76	31	3	0	110.7	9.3	0.3	0
A09G2086		No Annotation	0dpa-down	-1.7601	0.000191273	82.3	11.7	1	0	106	4.7	0.7	0
A10G0863	AT4G36470.1	S-adenosyl-L-methionine-dependent methyltransferases superfamily protein	0dpa-down	-2.00674	2.41802e-10	92	101	60.7	119.3	160.3	87.3	68.3	105.7
A10G1332	AT5G59320.1	lipid transfer protein 3	0dpa-down	-1.311	4.15138e-05	100.7	28768.3	74105	93883.3	216	32310	80486.7	87346.7
A10G1536	AT5G49470.3	PAS domain-containing protein tyrosine kinase family protein	0dpa-down	-1.27818	9.06027e-10	213.7	254.7	163.7	131.7	386.3	264.3	237	189.3
A10G1880	AT1G66620.1	Protein with RING/U-box and TRAF-like domains	0dpa-down	-1.82206	7.55248e-23	222.7	698.3	947	2176	337.3	689	644	2106
A10G1985	AT2G39710.1	Eukaryotic aspartyl protease family protein	0dpa-down	-1.7964	4.80695e-18	206.7	75.3	27.3	35	272.7	35.7	12.3	26.7
A10G2029	AT5G59080.1	No annotation	0dpa-down	-1.52667	0.000274051	125	104.3	68.3	145.7	152.3	67	50.7	70
A10G2086	AT2G39980.1	HXXXd-type acyl-transferase family protein	0dpa-down	-1.27986	0.0175693	40.3	217.3	162.7	483.7	82.3	221	114	431.3
A10G2232	AT3G14170.1	Plant protein of unknown function (dUF936)	0dpa-down	-1.18477	0.0317621	140.7	42.7	86.3	36	169.3	27.7	78.3	49.3
A10G2353		No Annotation	0dpa-down	-2.1576	1.57584e-13	394	28	0	5.7	1646.3	2	0.7	1450.3
A11G0009	AT3G62270.1	HCO3- transporter family	0dpa-down	-1.00622	1.33486e-05	1024.7	216.3	31	21.7	1230	80	23.7	34.3
A11G0108	AT5G24030.1	SLAC1 homologue 3	0dpa-down	-1.33167	0.00100297	145.3	55.3	15.7	16	172.3	17	21	12
A11G0889	AT2G46550.2	No annotation	0dpa-down	-1.10357	0.0235622	64	51.3	30.3	65.3	107.3	48	35.3	57.3
A11G0963	AT1G02330.1	No annotation	0dpa-down	-2.40703	1.04474e-45	107.3	92.7	66.3	57	640	605	490	469.3
A11G1024	AT4G08950.1	Phosphate-responsive 1 family protein	0dpa-down	-2.22436	0.00027609	161.3	22.7	1	0.7	254.7	0	1.3	1.7
A12G0118	AT5G64530.1	xylem NAC domain 1	0dpa-down	-1.35424	1.26119e-05	180.3	65.3	28.3	16	228.3	24	29.7	14
A12G0165	AT5G62890.4	Xanthine/uracil permease family protein	0dpa-down	-2.10391	0.000160136	54	16.3	19	45.7	170.3	7	12.7	48.3
A12G0237	AT2G15890.2	maternal effect embryo arrest 14	0dpa-down	-1.02329	0.000463161	148.7	92	76.3	137	207	84.7	137.3	302.7
A12G0518	AT1G23140.1	Calcium-dependent lipid-binding (CaLB domain) family protein	0dpa-down	-1.73047	0.00022898	93.7	30	14.3	20.7	133.7	20.7	11	21
A12G1407	AT1G68050.1	flavin-binding, kelch repeat, f box 1	0dpa-down	-1.70919	4.74065e-05	60.7	121.3	83.3	87.3	132.3	115	149	125.3
A12G2404	AT1G49000.1	No annotation	0dpa-down	-1.80008	5.66119e-05	65.3	9.3	1.7	1.3	92	2.3	0.3	1.3
A12G2405	AT3G18550.2	TCP family transcription factor	0dpa-down	-1.67406	1.75888e-05	191.7	68.3	21.7	12	280.3	69.7	44.3	21.3
A12G2477	AT2G36330.1	Uncharacterised protein family (UPF0497)	0dpa-down	-1.15132	1.45136e-10	249.3	110	57.7	50	606.3	70	87.7	69.7
A13G0907	AT2G39060.1	Nodulin MtN3 family protein	0dpa-down	-2.1453	0.000136236	94.3	18.7	0	0	269	0.3	0	0
A13G1406	AT5G17850.1	Sodium/calcium exchanger family protein	0dpa-down	-1.25396	0.00195484	60.3	309.3	537	563.7	119.3	325	537.3	484.3
A13G1409	AT1G28760.1	Uncharacterized conserved protein (dUF2215)	0dpa-down	-1.93524	3.45572e-33	173.3	143.7	84	95.3	694.3	434.7	300.3	380.7
D01G0474		No Annotation	0dpa-down	-1.66655	0.00257685	55	33.7	11.7	7.3	104	35	16.3	10.3
D01G0829	AT3G12750.1	zinc transporter 1 precursor	0dpa-down	-1.73429	3.63711e-06	92.3	147	42	9	104	19	4	6.7
D01G0911	AT1G76140.2	Prolyl oligopeptidase family protein	0dpa-down	-2.46498	0.000541616	51.3	45.3	9.7	2	74	2.7	0	2.7
D01G1852	AT5G22640.2	MORN (Membrane Occupation and Recognition Nexus) repeat-containing protein	0dpa-down	-1.90055	8.84779e-08	87	21.3	22.3	131	250.7	13.3	96	295.3
D02G1518		No Annotation	0dpa-down	-1.37866	5.18759e-05	146.3	98.7	108.7	74.3	153.3	53.7	112.3	62.3
D02G1767	AT5G13170.1	senescence-associated gene 29	0dpa-down	-1.79461	0.00945251	44	41.7	55.7	84.7	156.3	47.7	62.7	1044
D02G2066	AT1G49750.1	Leucine-rich repeat (LRR) family protein	0dpa-down	-1.26116	9.83556e-06	443.3	397.7	795.3	897.7	583.7	325.3	634	775.7
D02G2172	AT2G21440.1	RNA-binding (RRM/RBd/RNP motifs) family protein	0dpa-down	-1.26934	0.0487435	40.7	36.7	31.3	42.3	72.3	25.3	32.7	76
D03G0404	AT3G43220.2	Phosphoinositide phosphatase family protein	0dpa-down	-1.45708	0.00033077	435.3	144.3	4.3	0.3	579.3	51.3	1.7	0.7
D03G1125	AT2G29630.3	thiaminC	0dpa-down	-1.73602	2.27022e-08	78.7	141	117.7	83.7	157.3	155.3	188.3	122.3
D03G1135		No Annotation	0dpa-down	-1.96704	0.00182482	26.3	22	19	17.7	67.3	29.3	37.7	53.7
D04G0442	AT5G15240.2	Transmembrane amino acid transporter family protein	0dpa-down	-1.72064	4.24305e-05	111.3	60	73.3	75.7	156	41.3	87	120.7
D04G0445	AT1G74660.1	mini zinc finger 1	0dpa-down	-1.23559	1.75577e-10	267	291.7	247	339.7	384	302.7	260.7	390.3
D04G0493	AT3G01650.1	RING domain ligase1	0dpa-down	-1.62465	2.26237e-05	1773	1008.7	216.7	313.3	2187	646	344.3	335.3
D04G1335	AT1G69870.1	nitrate transporter 1.7	0dpa-down	-1.38276	0.00612032	79.7	50.7	80.7	288.3	107	57.7	78.7	219.3
D04G1956	AT5G08640.2	flavonol synthase 1	0dpa-down	-1.42772	0.00302256	160	40	2	0.3	164.7	14.3	4	0.7
D05G0507	AT5G25610.1	BURP domain-containing protein	0dpa-down	-1.55905	2.82582e-09	1560.3	980.3	465.7	731	2021.7	596	577.3	951
D05G0628	AT5G10770.1	Eukaryotic aspartyl protease family protein	0dpa-down	-1.54555	9.83556e-06	1386	577	77	65.7	1667	227	97.3	79.3
D05G0629	AT5G10770.1	Eukaryotic aspartyl protease family protein	0dpa-down	-1.50406	0.0457085	57.3	40.7	8.3	4.7	58.3	18	15.7	9.3
D05G0906	AT3G46870.1	Pentatricopeptide repeat (PPR) superfamily protein	0dpa-down	-1.48029	7.84349e-14	414	159	77	81	532	95.7	88.7	88
D05G1388	AT1G79110.2	zinc ion binding	0dpa-down	-1.17173	0.0204908	59.7	78.7	55	102.7	103.7	84.7	42.7	100.3
D05G1605	AT5G54770.1	thiazole biosynthetic enzyme, chloroplast (ARA6) (THI1) (THI4)	0dpa-down	-1.42053	1.0124e-26	627	672	398.7	166.7	1148	569	642	255
D05G1663	AT1G12010.1	2-oxoglutarate (2OG) and Fe(II)-dependent oxygenase superfamily protein	0dpa-down	-2.3583	1.75888e-05	200	184.7	146.3	590.7	748.3	156.3	151.3	3605.7
D05G1773	AT1G20030.1	Pathogenesis-related thaumatin superfamily protein	0dpa-down	-1.56501	0.000572386	49.7	88.3	82.3	135.3	103	110.7	58.3	303.3
D05G1879	AT1G75050.1	Pathogenesis-related thaumatin superfamily protein	0dpa-down	-1.25865	0.00752253	65.3	27.7	0.7	1.7	83	14.3	0.3	8
D05G2224	AT4G08300.1	nodulin MtN21 /EamA-like transporter family protein	0dpa-down	-1.10393	1.75887e-08	193.7	190	616	1579	340.3	226.7	559	2087
D05G3434		No Annotation	0dpa-down	-1.49286	9.86502e-05	137.7	184.3	113	71.7	238	130.7	186.7	175
D05G3473	AT4G27420.1	ABC-2 type transporter family protein	0dpa-down	-3.06504	1.20018e-13	40.7	17	0	0.3	94.7	3.3	0.3	0
D06G0147	AT5G42900.3	cold regulated gene 27	0dpa-down	-1.56047	2.43997e-05	68	104.7	94	51.3	128.7	116.3	149.3	108.7
D06G0297		No Annotation	0dpa-down	-1.29152	0.00565524	55.3	40.3	33.7	46.3	93.7	43.3	40.3	54.7
D06G0359	AT1G22030.1	No annotation	0dpa-down	-1.1529	0.00945251	54.7	84	51.3	121.7	133	88.7	40.7	144.3
D06G0506	AT1G15580.1	indole-3-acetic acid inducible 5	0dpa-down	-1.41642	0.0249358	29.7	79.7	50	274.3	61	87.7	59.3	215
D06G0832	AT5G20830.2	sucrose synthase 1	0dpa-down	-1.41287	1.21635e-17	2597	8250	13781.3	5836	3977	7395	14742	5675.7
D06G1104	AT5G10770.1	Eukaryotic aspartyl protease family protein	0dpa-down	-2.18847	1.79284e-05	59	16.7	11.3	11.3	84.3	4	7.7	18.3
D06G1542	AT5G64370.1	beta-ureidopropionase	0dpa-down	-1.6448	6.121e-07	91	158.3	107	116	215	203.7	136	80.7
D06G1668	AT3G01990.1	ACT domain repeat 6	0dpa-down	-1.14599	0.000269667	87	86.3	68.3	66	208	101.7	89.7	102.7
D06G2007	AT4G32510.1	HCO3- transporter family	0dpa-down	-2.45582	0.000347734	37.7	10.7	1.7	2.7	64.3	2.3	0.3	3
D06G2172	AT2G33775.1	ralf-like 19	0dpa-down	-2.19364	0.00754217	72.7	30	1.7	0	98.7	8	0.3	0
D07G0984	AT3G46640.3	Homeodomain-like superfamily protein	0dpa-down	-1.09237	6.40862e-05	163.7	179	125.7	86	244	161	175.3	167
D08G0712	AT5G22640.2	MORN (Membrane Occupation and Recognition Nexus) repeat-containing protein	0dpa-down	-1.17305	5.4712e-20	760.7	1450.3	900.3	1525.7	1203.3	1191	555.7	1482.7
D08G1272	AT3G61490.3	Pectin lyase-like superfamily protein	0dpa-down	-1.9243	1.9911e-10	53.7	49.3	51.3	186	223	56	48.7	1352.3
D09G0022		No Annotation	0dpa-down	-2.29449	4.99578e-16	62.7	102.3	40.7	21.3	286.3	232	168.7	334
D09G0265	AT5G40348.2	other RNA	0dpa-down	-1.70476	8.35203e-07	162.7	21.7	0	0	229.7	1	0	0
D09G0484	AT1G18400.1	BR enhanced expression 1	0dpa-down	-1.70272	3.1324e-07	160	45.7	2	0	218	4.3	0	2
D09G0861	AT3G47340.2	glutamine-dependent asparagine synthase 1	0dpa-down	-1.31254	0.0215257	157.7	78.7	33	247	380	60.3	63	1848.3
D09G1698	AT4G25420.1	2-oxoglutarate (2OG) and Fe(II)-dependent oxygenase superfamily protein	0dpa-down	-1.30573	1.61921e-05	102	186.7	112.3	226.7	179.3	171.3	87.3	222
D10G0103	AT2G32950.1	Transducin/Wd40 repeat-like superfamily protein	0dpa-down	-1.15333	0.0478301	100	51.7	18.3	11.7	123.3	55	19	13
D10G0438	AT1G31260.1	zinc transporter 10 precursor	0dpa-down	-1.50043	4.44847e-07	455.7	160	8.7	3.7	540.3	59	3	5
D10G0579	AT1G17710.2	Pyridoxal phosphate phosphatase-related protein	0dpa-down	-1.33576	0.00102634	316.7	50.3	3	24.3	406	0.7	1	21
D10G0643	AT4G29080.1	phytochrome-associated protein 2	0dpa-down	-2.00875	0.00093855	16.7	74.3	69	42	74.3	81.3	76	54.7
D10G0889	AT4G36470.1	S-adenosyl-L-methionine-dependent methyltransferases superfamily protein	0dpa-down	-2.24506	2.96432e-21	167.3	173.3	83.7	282.3	318	138.7	109.7	203
D10G1871	AT3G10960.1	AZA-guanine resistant1	0dpa-down	-1.09511	0.00201938	146.7	312	146	48	190.3	371.7	151	86
D10G2149	AT2G39370.1	No annotation	0dpa-down	-2.89111	3.91003e-22	141	40	1.3	15.3	225.3	14	5.3	8
D10G2219		No Annotation	0dpa-down	-1.37275	0.0190201	238.3	8.7	0	29	731	1	16.7	185.3
D10G2272		No Annotation	0dpa-down	-1.31224	7.12994e-05	68.3	81	58.7	89	163.7	120	94.7	149
D10G2497	AT5G59080.1	No annotation	0dpa-down	-1.3251	1.52808e-14	1315.7	1526.3	1091.3	1644.3	1860.3	1381.7	736.7	1154.7
D10G2568	AT3G06620.1	PAS domain-containing protein tyrosine kinase family protein	0dpa-down	-1.084	3.68381e-12	473	472	276	234	788.7	458.7	442.7	404
D11G0852	AT2G45350.1	Pentatricopeptide repeat (PPR) superfamily protein	0dpa-down	-1.06528	1.51416e-05	139.3	176.3	101	106	265	195	153	140.3
D11G2590	AT3G11010.1	receptor like protein 34	0dpa-down	-3.3381	1.78257e-09	15.7	29	16.3	52.7	68.3	49	17	13
D12G0159	AT2G22570.2	nicotinamidase 1	0dpa-down	-1.05199	0.0139621	91.3	144.3	113	77.3	135.3	128	166	227
D12G0672	AT5G67140.1	F-box/RNI-like superfamily protein	0dpa-down	-1.04424	0.00140396	399.7	312	186	147.7	571.3	152	205	146
D12G1525	AT1G68050.1	flavin-binding, kelch repeat, f box 1	0dpa-down	-1.29271	1.96138e-05	104.3	192	139	139	214.3	195.7	284.7	209
D12G1703	AT3G25620.2	ABC-2 type transporter family protein	0dpa-down	-1.79033	0.000590618	56	46.7	28.3	43.3	79	29.7	31.7	56.7
D12G2437	AT3G48950.1	Pectin lyase-like superfamily protein	0dpa-down	-2.09549	2.65474e-05	76.7	26	114.7	657.7	115.3	8	64.3	498
D12G2477	AT3G61840.1	Protein of unknown function (dUF688)	0dpa-down	-1.31998	0.00156876	72	134.7	107	161	126	121	117.3	147.7
D13G0015		No Annotation	0dpa-down	-1.20921	0.00026582	67.7	74.3	89.7	97	164.7	106	115.3	97.7
D13G0033	AT5G04870.1	calcium dependent protein kinase 1	0dpa-down	-10.8455	5.3244e-55	0	0.3	0	0	213.3	181	153.3	128.3
D13G0037	AT3G12390.1	Nascent polypeptide-associated complex (NAC), alpha subunit family protein	0dpa-down	-1.04916	0.00791784	61	114.7	109.3	85	149.7	267.3	243.3	231.7
D13G0165	AT3G11210.1	SGNH hydrolase-type esterase superfamily protein	0dpa-down	-1.19626	2.94261e-22	632.7	639.3	489.7	447.3	1590.3	1308	1000	855.3
D13G0199	AT2G29380.1	highly ABA-induced PP2C gene 3	0dpa-down	-1.0986	1.20499e-05	143.3	247.7	250	130.7	324	389.3	393.7	345.3
D13G0786	AT2G03090.1	expansin A15	0dpa-down	-1.03417	2.64588e-15	502.7	343.3	250	536.7	819.7	305.3	252.7	354.3
D13G1148	AT4G25010.1	Nodulin MtN3 family protein	0dpa-down	-2.10484	8.15618e-06	120.3	38	3.3	1	206.3	5.3	1	2.3
D13G1493	AT1G51100.1	No annotation	0dpa-down	-1.23084	0.0484341	43	53	53	41.7	82.7	72.3	74.3	70.3
Sca007264G01	AT3G09360.1	Cyclin/Brf1-like TBP-binding protein	0dpa-down	-2.60429	2.38932e-06	102	69	1	0	133	0.7	0	0.3
Sca007330G01	AT1G14890.1	Plant invertase/pectin methylesterase inhibitor superfamily protein	0dpa-down	-1.04526	0.000519143	154.7	124.3	111	184	187	113	95.7	155.3
Sca013634G01	AT5G24470.1	pseudo-response regulator 5	0dpa-down	-1.5374	4.99578e-16	339.3	426.7	274.3	255	732	464	524.7	453
Sca047584G01	AT1G56300.1	Chaperone dnaJ-domain superfamily protein	0dpa-down	-1.67795	0.00465799	43	44.7	26.7	24.7	60.7	41.7	34.3	39.7
A01G0116	AT4G03420.1	Protein of unknown function (dUF789)	2dpa_up	2.01853	2.45394e-66	2388.7	1226.3	986	1178.3	511	267.7	280	363
A01G0875	AT1G76140.2	Prolyl oligopeptidase family protein	2dpa_up	1.6845	4.04352e-39	1915	1825.7	562.7	135.7	2019	337	107	230.3
A13G1552	AT1G09240.1	nicotianamine synthase 3	2dpa_up	3.05147	1.86538e-30	236.7	408.3	123.7	21	193.3	37.7	21.7	29.7
D01G0829	AT3G12750.1	zinc transporter 1 precursor	2dpa_up	2.10315	0.000680938	92.3	147	42	9	104	19	4	6.7
D01G1293	AT5G62160.1	zinc transporter 12 precursor	2dpa_up	2.4237	7.24018e-26	1013.7	1381.7	522	163	915.3	159	102.7	150.3
D05G2161	AT1G35140.1	Phosphate-responsive 1 family protein	2dpa_up	1.45555	0.00627682	51.7	185	853.3	619	29	83.7	373.7	686.3
D12G0182	AT2G14960.1	Auxin-responsive GH3 family protein	2dpa_up	1.05151	0.0289179	67	97.7	12.3	2.7	81.3	53.7	14	7.3
D13G0096		No Annotation	2dpa_up	2.61558	9.6117e-61	282	584	490.3	411.3	72.3	99.3	52.3	62.3
D13G0098	AT3G10600.1	cationic amino acid transporter 7	2dpa_up	1.08508	3.2761e-08	343	302.3	213	231.7	176.7	141.7	118.3	107.7
D13G0139	AT3G10985.1	senescence associated gene 20	2dpa_up	7.595	0	13003	10106	7508	6640.7	71.3	51.7	39.7	38
D13G0152		No Annotation	2dpa_up	2.22131	7.1301e-39	230	401	417.7	425.3	51	89.7	75	105.3
Sca005105G01	AT5G62160.1	zinc transporter 12 precursor	2dpa_up	1.80794	5.11939e-39	3998.7	3497.3	1250.7	486	4331.3	656	412.7	532.7
Sca153506G01	AT2G39630.2	Nucleotide-diphospho-sugar transferases superfamily protein	2dpa_up	1.16871	2.8717e-15	986	593.7	429.7	402	511.7	238.3	216.3	201.7
A05G4016	AT2G19010.1	GdSL-like Lipase/Acylhydrolase superfamily protein	2dpa_down	-4.04121	5.23329e-05	162	39	21.7	12.7	63.7	147.3	37	42.3
A07G0514	AT3G31720.1	transposable element gene	2dpa_down	-1.00102	0.0465351	108.3	76.3	66.7	78	109.7	106.7	86	85
A09G0764	AT5G20630.1	germin 3	2dpa_down	-1.49789	0.0399463	25	46	56.3	30.3	34.3	127	177.7	139.7
A11G0963	AT1G02330.1	No annotation	2dpa_down	-2.70598	8.91071e-77	107.3	92.7	66.3	57	640	605	490	469.3
A13G1352		No Annotation	2dpa_down	-1.92952	8.9622e-43	1655	268.3	144.3	525	1982.7	673.7	858	1884
A13G1409	AT1G28760.1	Uncharacterized conserved protein (dUF2215)	2dpa_down	-1.57631	6.3449e-23	173.3	143.7	84	95.3	694.3	434.7	300.3	380.7
D01G0820	AT4G00231.1	ARM repeat superfamily protein	2dpa_down	-6.80732	1.15143e-27	72.3	10.3	21.7	1	76	124	58.3	137.7
D01G0822	AT1G16270.2	Protein kinase superfamily protein with octicosapeptide/Phox/Bem1p domain	2dpa_down	-12.538	7.2558e-97	483.3	33.3	141	0	512	736	324.7	970.3
D01G0824	AT1G56170.2	nuclear factor Y, subunit C2	2dpa_down	-10.9874	7.09302e-52	295	27.7	57.3	0	301.7	252	118.7	279.3
D01G0827	AT1G79440.1	aldehyde dehydrogenase 5F1	2dpa_down	-6.11511	2.00564e-52	166.7	17.7	113.7	3.3	176.3	247.3	218.3	622.3
D05G2593	AT5G41890.1	GdSL-like Lipase/Acylhydrolase superfamily protein	2dpa_down	-1.98458	1.53561e-05	39.7	23	21.3	21.7	54.7	85	86.3	67.7
D06G2062	AT5G48930.1	hydroxycinnamoyl-CoA shikimate/quinate hydroxycinnamoyl transferase	2dpa_down	-1.15569	0.0261446	32.3	59.7	215	61.3	21	146	298.3	97.3
D09G0022		No Annotation	2dpa_down	-1.19865	0.000680938	62.7	102.3	40.7	21.3	286.3	232	168.7	334
D09G2051	AT3G08770.2	lipid transfer protein 6	2dpa_down	-1.34314	6.1874e-41	2749	2023	1975	3640	3755.3	4861.7	6283.3	5919.3
D10G2271		No Annotation	2dpa_down	-1.78912	0.00255949	36	21	23.3	29.7	64.3	56.7	27.7	50.7
D12G1628	AT3G02940.1	myb domain protein 107	2dpa_down	-1.03443	1.19361e-05	772.7	212	144	199.7	944	328	431.3	428.7
D13G0033	AT5G04870.1	calcium dependent protein kinase 1	2dpa_down	-8.19983	3.8925e-55	0	0.3	0	0	213.3	181	153.3	128.3
D13G0037	AT3G12390.1	Nascent polypeptide-associated complex (NAC), alpha subunit family protein	2dpa_down	-1.09396	3.34265e-07	61	114.7	109.3	85	149.7	267.3	243.3	231.7
D13G0114	AT5G03960.1	IQ-domain 12	2dpa_down	-1.1262	4.96839e-07	160	140.7	165	530.3	293	300.3	521.7	867
A01G0116	AT4G03420.1	Protein of unknown function (dUF789)	4dpa_up	1.86998	5.92884e-31	2388.7	1226.3	986	1178.3	511	267.7	280	363
A01G0875	AT1G76140.2	Prolyl oligopeptidase family protein	4dpa_up	3.18437	4.50746e-08	1915	1825.7	562.7	135.7	2019	337	107	230.3
A01G1490		No Annotation	4dpa_up	1.07826	0.0306684	68	128.7	173	128.7	71.3	131.7	107.3	75.3
A13G1552	AT1G09240.1	nicotianamine synthase 3	4dpa_up	2.50596	0.000384193	236.7	408.3	123.7	21	193.3	37.7	21.7	29.7
D01G1293	AT5G62160.1	zinc transporter 12 precursor	4dpa_up	3.33588	8.92701e-09	1013.7	1381.7	522	163	915.3	159	102.7	150.3
D04G1809	AT3G13080.4	multidrug resistance-associated protein 3	4dpa_up	1.4467	7.44852e-06	1743	1349.3	431.7	120.3	1645.7	506.3	220.3	123
D06G0915	AT1G60960.1	iron regulated transporter 3	4dpa_up	1.41717	0.0252061	287	297.7	150.3	134.7	312.3	127	82.3	91.7
D10G0238	AT4G32480.1	Protein of unknown function (dUF506)	4dpa_up	1.21733	0.0383382	364.3	187.3	160.3	132.7	185	89.7	73.7	131
D11G0386	AT3G04120.1	glyceraldehyde-3-phosphate dehydrogenase C subunit 1	4dpa_up	2.07907	0.000270455	100.7	40.7	78.7	82.3	110.7	52.7	29	58.3
D12G1374	AT1G03940.1	HXXXd-type acyl-transferase family protein	4dpa_up	1.02106	0.00305033	0	246	343.7	3.7	0	240.7	275	8.3
D13G0096		No Annotation	4dpa_up	3.79839	1.10413e-51	282	584	490.3	411.3	72.3	99.3	52.3	62.3
D13G0139	AT3G10985.1	senescence associated gene 20	4dpa_up	7.59938	1.40053e-229	13003	10106	7508	6640.7	71.3	51.7	39.7	38
D13G0152		No Annotation	4dpa_up	2.50181	2.52198e-27	230	401	417.7	425.3	51	89.7	75	105.3
Sca005105G01	AT5G62160.1	zinc transporter 12 precursor	4dpa_up	2.41067	3.45543e-05	3998.7	3497.3	1250.7	486	4331.3	656	412.7	532.7
Sca153506G01	AT2G39630.2	Nucleotide-diphospho-sugar transferases superfamily protein	4dpa_up	1.13691	2.55697e-05	986	593.7	429.7	402	511.7	238.3	216.3	201.7
A01G1605	AT1G77120.1	alcohol dehydrogenase 1	4dpa_down	-1.11856	0.0376081	286.7	320.3	269.3	695	398	306.7	513.3	1028.3
A02G0454	AT5G18670.1	beta-amylase 3	4dpa_down	-1.12704	0.0221478	89.3	85.3	114.7	70.3	149.3	96	181.7	111
A02G1527		No Annotation	4dpa_down	-1.55011	0.0014669	284.3	112.7	55.3	63.3	348.3	187.7	171	167
A04G0058	AT3G09950.1	No annotation	4dpa_down	-1.18047	0.00731349	1836.3	583	261.7	109.3	2702	461.3	697.7	315.3
A04G0149		No Annotation	4dpa_down	-1.58127	0.00528951	67.7	97.7	282	266	63.3	124.7	461	139
A04G0354		No Annotation	4dpa_down	-1.28958	0.00377793	105.3	137.7	92.7	87.3	138.3	144	215.7	198.7
A05G0660	AT2G27385.3	Pollen Ole e 1 allergen and extensin family protein	4dpa_down	-1.07444	5.97858e-05	10802.7	7302.3	5578.3	5069.7	12356.3	10170	12000.3	9255
A06G1107	AT1G61050.1	alpha 1,4-glycosyltransferase family protein	4dpa_down	-1.05196	0.00641183	446.3	213.3	138	190.3	477.3	240.7	228.7	238.7
A08G1801	AT2G30110.1	ubiquitin-activating enzyme 1	4dpa_down	-1.56251	0.00458932	42.3	57.3	62.7	112.7	43.7	122.3	164.3	325.3
A09G0764	AT5G20630.1	germin 3	4dpa_down	-1.59416	2.04385e-05	25	46	56.3	30.3	34.3	127	177.7	139.7
A09G1671	AT5G24380.1	YELLOW STRIPE like 2	4dpa_down	-1.3031	0.0233771	78.3	87.3	65.7	94.3	121.7	113	118.3	157.3
A09G2445	AT4G25320.1	AT hook motif dNA-binding family protein	4dpa_down	-2.48979	3.39669e-06	288	125.7	34.3	56.3	314.7	113	136	197.7
A11G0963	AT1G02330.1	No annotation	4dpa_down	-2.83573	2.81512e-37	107.3	92.7	66.3	57	640	605	490	469.3
A11G2875	AT1G70000.2	myb-like transcription factor family protein	4dpa_down	-1.00376	0.000304701	356	240	181.3	247.3	377.7	278	331.3	305.7
A12G2300	AT5G52640.1	heat shock protein 90.1	4dpa_down	-1.28094	0.00299136	1050.3	598.3	646	326.3	652	610.7	492	229.7
A13G1352		No Annotation	4dpa_down	-2.83177	4.26792e-32	1655	268.3	144.3	525	1982.7	673.7	858	1884
A13G1409	AT1G28760.1	Uncharacterized conserved protein (dUF2215)	4dpa_down	-1.76567	1.69674e-09	173.3	143.7	84	95.3	694.3	434.7	300.3	380.7
D01G0169	AT1G53025.1	Ubiquitin-conjugating enzyme family protein	4dpa_down	-1.97957	0.00467135	53	13.3	41.7	46	36.3	32	81.3	23.3
D01G0822	AT1G16270.2	Protein kinase superfamily protein with octicosapeptide/Phox/Bem1p domain	4dpa_down	-10.9311	9.38634e-08	483.3	33.3	141	0	512	736	324.7	970.3
D01G0824	AT1G56170.2	nuclear factor Y, subunit C2	4dpa_down	-9.7446	4.82135e-07	295	27.7	57.3	0	301.7	252	118.7	279.3
D01G0827	AT1G79440.1	aldehyde dehydrogenase 5F1	4dpa_down	-5.33584	0.00165071	166.7	17.7	113.7	3.3	176.3	247.3	218.3	622.3
D01G1852	AT5G22640.2	MORN (Membrane Occupation and Recognition Nexus) repeat-containing protein	4dpa_down	-2.12217	8.78955e-05	87	21.3	22.3	131	250.7	13.3	96	295.3
D02G0834	AT1G22250.1	No annotation	4dpa_down	-1.19051	0.0014669	447.7	160.3	95	115	578	214	209.3	258.3
D04G1176	AT5G02230.2	Haloacid dehalogenase-like hydrolase (HAd) superfamily protein	4dpa_down	-1.04611	0.00376412	281	182.7	180.7	248.7	388	255	350.7	780.3
D04G1387		No Annotation	4dpa_down	-1.39384	3.23553e-06	59.3	59.3	130	125.3	90.7	88	249.3	245.7
D04G1847		No Annotation	4dpa_down	-1.90973	5.97858e-05	94.3	76.3	43	34.3	102.3	94	145	115.7
D05G2593	AT5G41890.1	GdSL-like Lipase/Acylhydrolase superfamily protein	4dpa_down	-2.79955	2.15726e-07	39.7	23	21.3	21.7	54.7	85	86.3	67.7
D06G0692	AT4G29180.2	root hair specific 16	4dpa_down	-1.71053	0.0259688	0	70.3	30.3	11	1.3	93.3	74	16
D06G2062	AT5G48930.1	hydroxycinnamoyl-CoA shikimate/quinate hydroxycinnamoyl transferase	4dpa_down	-1.09177	0.0128615	32.3	59.7	215	61.3	21	146	298.3	97.3
D07G0416	AT3G47420.1	phosphate starvation-induced gene 3	4dpa_down	-1.99268	0.0421186	315.7	168.3	77.7	219.3	254	82.3	68	87.7
D07G0457	AT5G51100.1	Fe superoxide dismutase 2	4dpa_down	-1.20387	6.68888e-05	83	117.7	125.7	134	112	215.7	265.7	313.3
D09G0022		No Annotation	4dpa_down	-1.78469	0.00458932	62.7	102.3	40.7	21.3	286.3	232	168.7	334
D09G2051	AT3G08770.2	lipid transfer protein 6	4dpa_down	-1.59171	3.19158e-19	2749	2023	1975	3640	3755.3	4861.7	6283.3	5919.3
D10G1141		No Annotation	4dpa_down	-5.13497	1.20694e-10	9	2.7	1.3	0	44	25.7	97.7	182
D11G1843	AT3G47840.1	Tetratricopeptide repeat (TPR)-like superfamily protein	4dpa_down	-1.03736	0.0390859	227.3	164	123.3	115	313	290	266	155.7
D12G1628	AT3G02940.1	myb domain protein 107	4dpa_down	-1.66814	7.70678e-14	772.7	212	144	199.7	944	328	431.3	428.7
D12G1629		No Annotation	4dpa_down	-2.62671	1.32268e-08	315.7	61.7	25.3	72.3	377.3	66.3	130.3	178.3
D12G1630	AT5G16770.2	myb domain protein 9	4dpa_down	-2.07735	3.51472e-06	403.3	73	40.3	89	458.3	87	161	210.7
D13G0033	AT5G04870.1	calcium dependent protein kinase 1	4dpa_down	-10.4089	1.17286e-36	0	0.3	0	0	213.3	181	153.3	128.3
D13G0037	AT3G12390.1	Nascent polypeptide-associated complex (NAC), alpha subunit family protein	4dpa_down	-1.06594	0.00187282	61	114.7	109.3	85	149.7	267.3	243.3	231.7
D13G0060	AT2G40610.1	expansin A8	4dpa_down	-7.39427	1.21991e-19	5.3	4.3	1	1	11.3	50.7	90.7	302
D13G0114	AT5G03960.1	IQ-domain 12	4dpa_down	-2.08208	3.84674e-14	160	140.7	165	530.3	293	300.3	521.7	867
Sca005135G02		No Annotation	4dpa_down	-2.44152	0.0242474	11.7	13.3	75.7	67.7	14.3	20.3	438	187.7
A01G0030	AT3G19000.2	2-oxoglutarate (2OG) and Fe(II)-dependent oxygenase superfamily protein	6dpa_up	1.1356	0.0039454	40	54	79.7	76.3	44	51	66	37.3
A01G0116	AT4G03420.1	Protein of unknown function (dUF789)	6dpa_up	1.80221	7.4788e-67	2388.7	1226.3	986	1178.3	511	267.7	280	363
A01G0965	AT5G42680.2	Protein of unknown function, dUF617	6dpa_up	1.35581	3.23041e-12	89.3	55.7	101.3	227.3	95.3	42.7	68	95.3
A02G0837	AT1G49890.1	Family of unknown function (dUF566)	6dpa_up	1.22968	8.39431e-20	185.7	130	203.7	643	212.3	140.3	183.3	293.7
A02G1569	AT2G18500.1	ovate family protein 7	6dpa_up	1.35909	0.000826709	14.3	17.3	4	67	6.3	2.3	6	28
A02G1802	AT1G52190.1	Major facilitator superfamily protein	6dpa_up	1.01848	2.42953e-10	163.7	140	147.3	374.7	135.7	130.7	91	198.7
A03G0353	AT5G02500.2	heat shock cognate protein 70-1	6dpa_up	1.02007	0.0234775	0.3	2.3	23	65.7	3	4	29.7	35
A03G0417	AT2G38080.1	Laccase/diphenol oxidase family protein	6dpa_up	1.15076	0.0376616	38.7	31.7	11	46.7	45.7	21.3	6.3	22.7
A03G0636		No Annotation	6dpa_up	1.37874	0.0161349	5.3	7.3	12	49	5	2.7	7.3	20.3
A03G0977	AT1G14780.1	MAC/Perforin domain-containing protein	6dpa_up	1.7404	2.87779e-07	2	0.7	3.3	84.7	1	0.7	0	27
A04G0149		No Annotation	6dpa_up	1.03019	6.33733e-05	67.7	97.7	282	266	63.3	124.7	461	139
A04G0621	AT2G37040.1	PHE ammonia lyase 1	6dpa_up	1.26481	0.00178851	17	6.7	7	63.7	14.3	4.7	5.7	28.3
A05G0067	AT5G20410.1	monogalactosyldiacylglycerol synthase 2	6dpa_up	1.34889	0.00329891	42.7	40	48.7	58.7	41.7	45.7	44.7	24.7
A05G0092	AT5G20150.1	SPX domain gene 1	6dpa_up	1.24048	2.65316e-10	198	157	159	221.3	188	104	127.3	100.3
A05G1250	AT5G46240.1	potassium channel in Arabidopsis thaliana 1	6dpa_up	1.28334	1.18736e-12	29.7	41.7	56.3	299.3	46.7	36.7	29	132
A05G1316	AT1G28570.2	SGNH hydrolase-type esterase superfamily protein	6dpa_up	1.00094	0.0254286	5.3	4.7	8	72.7	4	4.3	9.3	39
A05G2389	AT3G56380.1	response regulator 17	6dpa_up	1.16338	0.0400193	28	21.3	24.3	50	28.3	28.3	19.3	23.7
A05G3591	AT5G38260.1	Protein kinase superfamily protein	6dpa_up	1.12831	0.000153083	1.3	2.3	1.3	105.3	2.3	1.3	0.7	51.7
A06G0111	AT5G42650.1	allene oxide synthase	6dpa_up	1.61866	3.82318e-14	0	66	111.7	188.3	0.3	42	85.3	65.7
A06G0280	AT4G08980.5	F-BOX WITH Wd-40 2	6dpa_up	1.19675	0.0029762	34.7	189.7	60.7	63	100	81.7	37	29.3
A06G0323	AT4G08555.1	No annotation	6dpa_up	2.00012	8.24768e-15	0.3	0.7	3.7	151.7	0.3	0.7	0.7	40.7
A06G0620	AT4G26220.1	S-adenosyl-L-methionine-dependent methyltransferases superfamily protein	6dpa_up	1.29645	1.94305e-05	149	87	64.3	125	232.3	174	73.7	54.7
A06G0643	AT5G56970.1	cytokinin oxidase 3	6dpa_up	1.27415	0.00349827	0	0	1.7	64.7	2.3	0	0	28.7
A06G0995	AT1G34220.2	Regulator of Vps4 activity in the MVB pathway protein	6dpa_up	3.63424	1.48071e-17	141	124.7	85.3	78.3	106.3	83	74	6.7
A06G1320	AT1G62262.1	SLAC1 homologue 4	6dpa_up	1.4104	1.81612e-06	8	71	126	154.7	7	91	69	62.3
A06G1403	AT3G56200.1	Transmembrane amino acid transporter family protein	6dpa_up	1.02785	4.22553e-14	747	627	711.3	565.3	833	693.7	734.3	297.7
A07G0303	AT2G26660.1	SPX domain gene 2	6dpa_up	1.12526	3.00784e-09	321.7	223	149	228.3	272.3	146.7	117.7	112
A07G0354	AT3G47420.1	phosphate starvation-induced gene 3	6dpa_up	1.94079	9.67582e-17	176	120	76	189.7	160	77	47.7	53
A07G0742	AT3G59080.2	Eukaryotic aspartyl protease family protein	6dpa_up	1.15632	0.00448921	23	11	37.3	69	27	16.7	31	33.3
A07G1669	AT5G44870.1	disease resistance protein (TIR-NBS-LRR class) family	6dpa_up	1.04352	0.0455386	0.7	0	2.7	51.7	0	0	1.3	27
A08G0138	AT2G07180.2	Protein kinase superfamily protein	6dpa_up	1.16687	2.58284e-05	70.3	35.3	62.7	124.7	84.3	19	40	59.7
A08G0938	AT5G24660.1	response to low sulfur 2	6dpa_up	1.15199	0.0132598	97.7	72	70	52	99	67	63.3	25
A08G1208	AT1G12360.1	Sec1/munc18-like (SM) proteins superfamily	6dpa_up	1.04198	0.0337123	0.7	2.7	10	48.7	0.3	1.7	9.7	25.3
A09G0135	AT2G03090.1	expansin A15	6dpa_up	1.2504	1.02991e-09	126	114.7	104.3	219.3	118.3	87.3	79.3	98.7
A09G1947	AT3G23050.1	indole-3-acetic acid 7	6dpa_up	1.32663	4.92478e-05	6.7	7.3	6	96	14.3	9.3	9	41
A10G0538	AT1G17710.2	Pyridoxal phosphate phosphatase-related protein	6dpa_up	1.03307	0.00770386	54.7	46	49.7	80.7	50.3	45	62.3	42.3
A10G0878	AT1G15380.2	Lactoylglutathione lyase / glyoxalase I family protein	6dpa_up	1.56943	7.58992e-08	13.7	19.3	35.7	133.3	17.7	14.7	24.7	48.3
A10G1091	AT4G13670.1	plastid transcriptionally active 5	6dpa_up	1.27805	0.00311602	88.3	64.3	44.7	61	86.3	56.7	41.7	27
A10G2029	AT5G59080.1	No annotation	6dpa_up	1.15255	6.56745e-06	125	104.3	68.3	145.7	152.3	67	50.7	70
A10G2090	AT4G00430.1	plasma membrane intrinsic protein 1;4	6dpa_up	1.95095	1.39562e-10	30	26.7	28.7	120	19	18	10.7	33.3
A11G0020	AT3G17790.1	purple acid phosphatase 17	6dpa_up	2.47886	3.11184e-130	1340.3	528.7	481	1929	1030.7	394.3	490.3	370.3
A11G1419	AT2G32990.1	glycosyl hydrolase 9B8	6dpa_up	1.07194	0.0321378	54.7	48	35	54	51.7	50	21.7	27.7
A11G3188	AT1G72160.1	Sec14p-like phosphatidylinositol transfer family protein	6dpa_up	1.1785	1.12006e-20	345.7	453.3	331.7	630	308.3	454.7	400.7	299.3
A13G0050	AT2G40610.1	expansin A8	6dpa_up	1.78325	9.66466e-30	13	17.3	96.3	415.3	12.7	9.7	29.7	129.7
A13G0082	AT3G10600.1	cationic amino acid transporter 7	6dpa_up	1.11109	6.34795e-05	68	92.3	54.7	137	66	61.7	83	68.3
A13G0666	AT2G02990.1	ribonuclease 1	6dpa_up	1.23838	0.000663318	10.3	9	3.7	96.3	10.3	6.7	4.7	43.7
A13G1426	AT5G33370.2	GdSL-like Lipase/Acylhydrolase superfamily protein	6dpa_up	1.03419	2.67447e-14	26.7	101	240	1361	25.7	103.7	156.3	714.3
A13G2098	AT4G34560.1	No annotation	6dpa_up	1.14141	2.86665e-06	38.7	257.3	172.3	166.7	43.7	247.7	104	80.7
D01G1961	AT5G06510.2	nuclear factor Y, subunit A10	6dpa_up	1.09298	0.0291737	27.7	13.7	25.3	48.3	28.3	12.3	20.3	24.3
D02G2275		No Annotation	6dpa_up	1.24069	0.00231155	1.7	0	27.3	78	1.3	1.7	10	35.3
D03G0563	AT1G59870.1	ABC-2 and Plant PdR ABC-type transporter family protein	6dpa_up	1.73807	1.28263e-14	0	0	2	191.3	1.3	0.3	0.3	61.7
D04G0046		No Annotation	6dpa_up	1.1059	2.58569e-05	0	0	1	145.7	0	0	0.7	72.7
D04G1612		No Annotation	6dpa_up	1.0951	2.0562e-14	185	115	125.7	766.7	242.7	111.3	127.7	385.7
D05G0357	AT5G20790.2	No annotation	6dpa_up	1.1359	0.00146476	41	64.3	86.7	102.3	60.3	66.3	78	49.7
D05G0972	AT5G60660.1	plasma membrane intrinsic protein 2;4	6dpa_up	1.26513	1.63359e-05	84	32.3	84.3	141.7	24.7	34	47.7	63.3
D05G1038	AT2G22330.1	cytochrome P450, family 79, subfamily B, polypeptide 3	6dpa_up	1.45301	0.000148261	0.3	3.3	14.7	70	1	8	11.3	27.3
D05G1152	AT3G22800.1	Leucine-rich repeat (LRR) family protein	6dpa_up	2.01804	7.17306e-10	0	0	1.3	104.3	0	0	0.3	27.7
D05G1413	AT5G46240.1	potassium channel in Arabidopsis thaliana 1	6dpa_up	1.40964	6.16128e-11	55	30.3	64.7	258.3	56	52.7	45.3	104.3
D05G1470	AT2G42610.2	Protein of unknown function (dUF640)	6dpa_up	1.14625	0.0089252	20.3	26.3	30.3	57	21.3	24.3	21.3	27.7
D05G2289		No Annotation	6dpa_up	1.61983	1.43816e-05	46.7	41.3	43.3	78.3	38.3	28.3	27.3	27.3
D06G1636	AT4G21990.2	APS reductase 3	6dpa_up	1.02228	4.49251e-20	1308	888.7	1002	1037.3	1571.7	984.7	918	547.3
D06G1690		No Annotation	6dpa_up	1.01472	2.96692e-23	140	202	289.7	964	150.7	173	210.7	512
D06G1745	AT3G14850.1	TRICHOME BIREFRINGENCE-LIKE 41	6dpa_up	1.29731	7.59973e-16	281.7	119.7	60	346	322.7	91.7	88	151
D06G2373	AT2G39420.1	alpha/beta-Hydrolases superfamily protein	6dpa_up	2.93079	6.14582e-65	18.3	1	14.3	401	26	0.3	0	56.3
D07G0416	AT3G47420.1	phosphate starvation-induced gene 3	6dpa_up	1.41822	3.95866e-09	315.7	168.3	77.7	219.3	254	82.3	68	87.7
D07G0489	AT4G24970.1	Histidine kinase-, dNA gyrase B-, and HSP90-like ATPase family protein	6dpa_up	1.14987	0.000107144	76.3	87.3	94.3	111.3	99.3	81.7	62.7	53.7
D07G2053		No Annotation	6dpa_up	1.29831	0.000501853	0.3	1.3	7	90	0.3	0	7.7	39
D07G2125	AT3G23050.1	indole-3-acetic acid 7	6dpa_up	1.01209	3.59422e-13	22.7	38.7	34.3	552.3	44.7	22.7	33.7	294.3
D08G1269	AT5G56010.1	heat shock protein 81-3	6dpa_up	1.29472	0.000445069	21.3	11.3	33	73.3	10.3	8.3	10	32
D08G1774	AT4G17030.1	expansin-like B1	6dpa_up	1.03166	0.00663088	0	1.3	20.3	79.7	0	1.3	2.7	41.7
D09G2093	AT1G05420.1	ovate family protein 12	6dpa_up	1.01314	0.0326024	1.7	3.7	32	64	1.3	2.3	33	34
D09G2252	AT3G06370.1	sodium hydrogen exchanger 4	6dpa_up	1.37752	9.8425e-05	13.7	12	7	90.7	9.7	13.3	13.7	37.3
D10G0865		No Annotation	6dpa_up	1.22136	0.021751	3.7	2.3	7.7	51.7	4.3	2.3	2	23.7
D10G1436	AT4G13700.1	purple acid phosphatase 23	6dpa_up	1.16789	1.17812e-19	410.7	248.3	238.3	495	384.7	244.3	208.7	235.7
D10G2360	AT4G00430.1	plasma membrane intrinsic protein 1;4	6dpa_up	1.07188	0.000212403	85	64.3	77.7	180	54	47	62	91.7
D11G0018	AT3G17790.1	purple acid phosphatase 17	6dpa_up	2.9317	1.07417e-63	264.3	143.7	112.7	375	231	70.7	109.3	52.7
D11G1073		No Annotation	6dpa_up	1.26875	0.000615236	22.3	20.3	13.7	80.7	37	14.7	18.7	36
D11G1996	AT2G14900.1	Gibberellin-regulated family protein	6dpa_up	1.03189	0.000109968	32.3	53.3	71.7	141.7	25.3	41.3	44.7	74.3
D11G2923		No Annotation	6dpa_up	1.1209	0.0177389	2.7	37.7	61	61.3	1.3	18.7	47.7	30.3
D11G2929	AT2G44260.2	Plant protein of unknown function (dUF946)	6dpa_up	1.05006	6.49194e-09	118.3	90	105.7	274.7	139.7	80.3	121	142.3
D11G3106		No Annotation	6dpa_up	1.65286	2.75875e-09	288	247.3	198.3	227	398	198	164.7	76.7
D11G3268	AT4G01470.1	tonoplast intrinsic protein 1;3	6dpa_up	1.09875	1.30044e-07	30.7	47	38.3	315.7	51	66.7	21	157.3
D12G1383		No Annotation	6dpa_up	1.59533	0.00142775	30.3	17.7	10.3	61	32.3	11	11	21.7
D12G1637	AT1G14220.1	Ribonuclease T2 family protein	6dpa_up	1.32182	0.00117209	7.3	12.3	33.3	64.7	16.7	11	23	27.7
D12G2012		No Annotation	6dpa_up	1.24123	0.0101521	40.3	43.3	41.3	51.7	30	45.7	41	23.3
D13G0096		No Annotation	6dpa_up	2.81942	3.57351e-52	282	584	490.3	411.3	72.3	99.3	52.3	62.3
D13G0098	AT3G10600.1	cationic amino acid transporter 7	6dpa_up	1.20472	6.0378e-10	343	302.3	213	231.7	176.7	141.7	118.3	107.7
D13G0139	AT3G10985.1	senescence associated gene 20	6dpa_up	7.54149	0	13003	10106	7508	6640.7	71.3	51.7	39.7	38
D13G0152		No Annotation	6dpa_up	2.10968	5.39268e-46	230	401	417.7	425.3	51	89.7	75	105.3
D13G1583	AT1G53310.3	phosphoenolpyruvate carboxylase 1	6dpa_up	1.0445	1.3582e-08	85	91	184	276.7	93	115	166	144.3
D13G1915	AT5G48670.1	AGAMOUS-like 80	6dpa_up	1.61741	3.81895e-08	8.7	40.3	76.7	121.3	13.3	40.7	40.7	42.3
Sca004768G09	AT1G09930.1	oligopeptide transporter 2	6dpa_up	1.09877	0.0101302	55	95.7	113	92.7	30	106.7	91.3	46.7
Sca011769G01		No Annotation	6dpa_up	1.42135	1.91119e-07	211	181.7	127.7	192.3	256	136	98	76.7
Sca064040G01		No Annotation	6dpa_up	1.19198	0.0109519	7	8.7	10.3	55.3	4.3	3.3	7	26
Sca153506G01	AT2G39630.2	Nucleotide-diphospho-sugar transferases superfamily protein	6dpa_up	1.09276	7.37234e-14	986	593.7	429.7	402	511.7	238.3	216.3	201.7
A01G0045	AT1G19440.1	3-ketoacyl-CoA synthase 4	6dpa_down	-1.53446	3.34626e-10	289	1600.7	527	53.3	279.3	1825.3	712	166.3
A01G0186	AT3G23470.1	Cyclopropane-fatty-acyl-phospholipid synthase	6dpa_down	-3.00819	1.33068e-48	31.7	16.3	18.3	36	20.3	29.7	40	311.3
A01G0329	AT1G53430.2	Leucine-rich repeat transmembrane protein kinase	6dpa_down	-1.09205	0.00031741	786	422.3	273.7	154.3	813.3	314.3	277.7	350.7
A01G0388	AT1G78830.1	Curculin-like (mannose-binding) lectin family protein	6dpa_down	-9.00187	2.56646e-16	0	0	0.3	0.3	2	0	1.3	244.7
A01G0389	AT1G78830.1	Curculin-like (mannose-binding) lectin family protein	6dpa_down	-10.6603	4.16288e-26	0.3	0.7	0	0.3	2	0.3	0	773.3
A01G0871	AT1G20450.2	dehydrin family protein	6dpa_down	-2.70191	7.03624e-05	99.7	128.7	155.7	226.7	131	99.3	184.3	1597.7
A01G0934		No Annotation	6dpa_down	-1.47318	0.000600628	144.3	96.7	92.7	139	210.3	89.3	121	414.3
A01G1153	AT5G03680.1	duplicated homeodomain-like superfamily protein	6dpa_down	-1.25458	4.8938e-06	32.3	58.7	55.3	55.7	31	66.3	64.7	142
A01G1559	AT1G09830.1	Glycinamide ribonucleotide (GAR) synthetase	6dpa_down	-1.73331	5.18491e-42	2928.7	1267	1059.3	435	2958.3	1055	1262	1546.3
A01G1899	AT2G39800.3	delta1-pyrroline-5-carboxylate synthase 1	6dpa_down	-5.52101	2.2277e-11	1	2.3	0.7	4.3	5	1	1	216.3
A01G1909	AT5G02230.2	Haloacid dehalogenase-like hydrolase (HAd) superfamily protein	6dpa_down	-1.05229	2.12369e-06	572	579.7	410	283	649.3	541.3	549.3	626
A01G2141	AT4G03140.1	NAd(P)-binding Rossmann-fold superfamily protein	6dpa_down	-4.87772	1.11266e-11	30	7	7.7	4	47	1	10.3	129.3
A01G2159		No Annotation	6dpa_down	-1.12273	0.0461011	37.7	18	21	27.3	45.7	23.7	26.3	63.7
A02G0019	AT4G11150.1	vacuolar ATP synthase subunit E1	6dpa_down	-1.30004	0.0481628	25.3	11.7	22.7	24.3	32.7	22.3	26	64
A02G0141		No Annotation	6dpa_down	-4.78245	6.59758e-20	5.7	19.3	35.7	2.3	10.3	24	75.7	72.3
A02G0406	AT5G46050.1	peptide transporter 3	6dpa_down	-2.11778	0.00792683	56	79.7	16.7	56	110.7	63.7	41	261.7
A02G0816	AT1G09970.2	Leucine-rich receptor-like protein kinase family protein	6dpa_down	-4.97717	3.22563e-08	0	0	0	2	0	0	0	71.3
A02G1527		No Annotation	6dpa_down	-1.29391	4.45175e-05	284.3	112.7	55.3	63.3	348.3	187.7	171	167
A02G1563	AT4G36740.1	homeobox protein 40	6dpa_down	-1.74348	0.0162676	311.3	111	255.3	84.3	266	128.7	488	309.7
A02G1729	AT5G57560.1	Xyloglucan endotransglucosylase/hydrolase family protein	6dpa_down	-1.8138	8.53869e-11	212.7	1578	2310.7	340	143.3	1906.7	3366	1277
A03G0083	AT3G16240.1	delta tonoplast integral protein	6dpa_down	-2.84332	0.00736277	0	1	0.3	15	0.7	0.3	0	118.7
A03G0088		No Annotation	6dpa_down	-1.71453	1.10326e-05	58.7	33.3	35.3	28	109	63	72.7	98
A03G0199	AT5G58390.1	Peroxidase superfamily protein	6dpa_down	-4.51489	8.41206e-08	0.7	1.7	2.7	2.7	1.7	3.3	1.7	67
A03G0334	AT5G48320.1	Cysteine/Histidine-rich C1 domain family protein	6dpa_down	-1.05199	0.00140664	173.7	131.7	106.7	45.7	148.3	149.7	123.3	102
A03G0872	AT1G14280.1	phytochrome kinase substrate 2	6dpa_down	-1.40477	0.00256439	370.7	93.3	23	20.3	374.7	76.7	22.7	58.3
A03G1252		No Annotation	6dpa_down	-1.18798	7.21057e-05	4.7	11.3	48.7	59.7	12.7	51.3	99.7	146.3
A03G1268	AT1G27210.1	ARM repeat superfamily protein	6dpa_down	-1.23247	6.8904e-05	781.7	580.3	518.3	409.7	779	514.7	617.3	1031.7
A03G1288	AT1G68510.1	LOB domain-containing protein 42	6dpa_down	-1.60375	0.000564731	33.3	36.7	45	22	34.3	22.3	30.3	72.7
A03G1329	AT5G13140.1	Pollen Ole e 1 allergen and extensin family protein	6dpa_down	-1.25053	0.00889296	137.7	75	56.3	30	161.3	76.3	52.3	76
A03G1333	AT5G13180.1	NAC domain containing protein 83	6dpa_down	-1.71333	2.43117e-08	410.3	530	296	78	452.7	543.7	282.3	273
A03G1408	AT4G10270.1	Wound-responsive family protein	6dpa_down	-1.64347	4.26851e-05	118.3	47	41	20	89.7	57	90.3	67.3
A03G1753	AT4G34680.2	GATA transcription factor 3	6dpa_down	-1.10491	0.00918877	63.7	68.3	40.7	69	100.3	39.7	62.7	158.3
A03G1802		No Annotation	6dpa_down	-2.62737	0.0147377	275.7	62	19	30	239.7	45.7	45.7	204.7
A04G0058	AT3G09950.1	No annotation	6dpa_down	-1.43566	2.42036e-06	1836.3	583	261.7	109.3	2702	461.3	697.7	315.3
A04G0354		No Annotation	6dpa_down	-1.08725	0.00036441	105.3	137.7	92.7	87.3	138.3	144	215.7	198.7
A04G0708	AT5G02230.2	Haloacid dehalogenase-like hydrolase (HAd) superfamily protein	6dpa_down	-1.70843	1.90249e-07	2896.3	1933.7	1631.3	1359	3372.3	1969.7	2629.3	4742
A04G0737	AT3G53990.1	Adenine nucleotide alpha hydrolases-like superfamily protein	6dpa_down	-1.26306	0.00341618	68	23.3	22	26.3	66.7	29	47.3	68
A04G0773	AT5G01520.1	RING/U-box superfamily protein	6dpa_down	-1.03939	9.09735e-05	168.3	111	86.7	136.7	203.7	124.7	139.7	299.3
A04G0856		No Annotation	6dpa_down	-1.029	0.0134037	139.3	112.7	77.3	35.3	176	137.7	93	77.7
A04G0897	AT4G03510.2	RING membrane-anchor 1	6dpa_down	-1.57024	0.00282246	13.3	13.7	5.7	21	20.3	3.7	6.3	67
A04G1054	AT2G16500.1	arginine decarboxylase 1	6dpa_down	-1.49859	6.63479e-11	58.3	535	262.7	120	77.3	375	173	360
A04G1376	AT5G06710.2	homeobox from Arabidopsis thaliana	6dpa_down	-1.09774	0.00446358	132.7	82	74.3	42.7	128.7	97	101	99
A05G0390	AT5G25610.1	BURP domain-containing protein	6dpa_down	-1.24174	3.69054e-08	3190.3	1374.7	174	103	4040.7	604.3	249.7	260
A05G0509	AT5G10770.1	Eukaryotic aspartyl protease family protein	6dpa_down	-1.39263	0.000133078	643.3	373	151	181	704.7	280.7	218	507
A05G0561	AT3G20830.1	AGC (cAMP-dependent, cGMP-dependent and protein kinase C) kinase family protein	6dpa_down	-1.7961	0.0038187	33.7	21.7	16.3	15.3	33.7	9.7	21.3	57
A05G0742	AT3G47160.2	RING/U-box superfamily protein	6dpa_down	-1.2916	0.000198571	566.3	313.3	201.7	116.3	603.7	307	321.7	306
A05G0759	AT3G54140.1	peptide transporter 1	6dpa_down	-2.55979	0.000183829	20.7	10.3	8	11.7	50.7	12.3	11	74
A05G1008	AT1G80920.1	Chaperone dnaJ-domain superfamily protein	6dpa_down	-1.70212	0.0124325	389.3	111.3	98.3	63.7	323.3	131.7	133.3	224
A05G1041	AT1G15780.1	No annotation	6dpa_down	-1.22675	0.00410728	1039	491.7	260.3	317.3	1217.7	450	436.3	802.7
A05G1059	AT1G80130.1	Tetratricopeptide repeat (TPR)-like superfamily protein	6dpa_down	-1.65491	0.0455065	45.3	20.7	38.3	111	70.7	32.7	67.7	381.3
A05G1089	AT1G59870.1	ABC-2 and Plant PdR ABC-type transporter family protein	6dpa_down	-1.46013	0.00716721	231.7	112	49.3	30	232.3	90.3	62	87.3
A05G1090	AT3G16350.1	Homeodomain-like superfamily protein	6dpa_down	-1.05291	0.00296797	193.3	102.3	68.7	91	174.3	89	75	201.3
A05G1397		No Annotation	6dpa_down	-1.90964	0.00107825	17.3	21.7	17.3	22.7	27.3	22.3	25	90.3
A05G1428	AT1G11530.1	C-terminal cysteine residue is changed to a serine 1	6dpa_down	-1.12931	7.18374e-13	993.7	487	439.3	343.3	1045.7	475	586.7	804
A05G1492	AT1G62380.1	ACC oxidase 2	6dpa_down	-1.5062	0.000350573	212.7	168.7	92.7	102.7	337.7	111	77.7	310.7
A05G1879	AT4G33580.2	beta carbonic anhydrase 5	6dpa_down	-2.55058	0.00464829	67	30.7	17	19.3	85.3	25.3	20.3	124
A05G1908		No Annotation	6dpa_down	-1.38948	0.0419222	31.3	22.7	16.7	19	41	23	12	53
A05G1959	AT1G35910.1	Haloacid dehalogenase-like hydrolase (HAd) superfamily protein	6dpa_down	-1.39127	1.68594e-05	150	85.3	84.7	37.3	165.7	66	121.7	104.7
A05G2062	AT3G43630.1	Vacuolar iron transporter (VIT) family protein	6dpa_down	-2.38438	0.0174094	0.7	0.7	2.3	14.3	2	0.7	8	82
A05G2137	AT1G72180.1	Leucine-rich receptor-like protein kinase family protein	6dpa_down	-1.37093	0.000212436	222.3	159.7	132	103.7	194.7	160.3	156.7	286.3
A05G2242	AT4G37260.1	myb domain protein 73	6dpa_down	-1.03512	0.000101386	653	606.7	429	239	734.3	477.3	466.7	523.3
A05G2921	AT2G33500.2	B-box type zinc finger protein with CCT domain	6dpa_down	-1.03321	0.0262729	68.7	46	30	29.3	101	59.3	43.7	64.3
A05G3762	AT5G10570.1	basic helix-loop-helix (bHLH) dNA-binding superfamily protein	6dpa_down	-2.68979	5.32993e-05	25.7	5.3	5.7	15.3	5.7	4.3	3.7	104.3
A06G0022	AT1G75890.2	GdSL-like Lipase/Acylhydrolase superfamily protein	6dpa_down	-1.40217	2.08316e-35	308.3	882	907.7	351.7	303.7	1072.3	1133.3	999.3
A06G0225	AT5G49630.1	amino acid permease 6	6dpa_down	-1.52617	0.000688699	202	97	91.7	83.3	225.7	81.3	69.7	258
A06G0385	AT1G44160.1	HSP40/dnaJ peptide-binding protein	6dpa_down	-3.02105	0.00190684	11.3	4.3	2.7	9.7	14	3	7	86.3
A06G0591	AT5G19740.1	Peptidase M28 family protein	6dpa_down	-1.25036	3.077e-07	163.7	103.3	129	140.3	201.7	102.3	197.7	358
A06G0592		No Annotation	6dpa_down	-1.05543	0.00194082	878.7	531.7	583.7	587	867.3	542	855	1311
A06G1139	AT1G28330.5	dormancy-associated protein-like 1	6dpa_down	-1.19257	0.0129932	2576.7	782	682	837.3	3363.3	495	1456.3	2075
A06G1257	AT1G54100.2	aldehyde dehydrogenase 7B4	6dpa_down	-1.37458	0.00389511	54	38.7	37	34	59.7	36.3	39.7	94.3
A06G1341	AT1G62380.1	ACC oxidase 2	6dpa_down	-3.51252	1.13976e-07	54.3	68	60.3	64.7	88.7	57.3	78.3	786.3
A06G1407	AT3G10985.1	senescence associated gene 20	6dpa_down	-1.0252	0.0120743	62.3	91	372.7	98	66.3	103.3	583	213.7
A06G1995	AT1G29670.1	GdSL-like Lipase/Acylhydrolase superfamily protein	6dpa_down	-2.35109	3.02507e-08	7	4	14	12.3	4.7	5.7	27.7	68
A07G0377	AT5G51190.1	Integrase-type dNA-binding superfamily protein	6dpa_down	-1.22762	0.00731201	25.7	36	23.7	26.3	25.7	28.7	37.3	66.3
A07G0378	AT5G61600.1	ethylene response factor 104	6dpa_down	-1.73596	0.00619829	41.3	54.7	34.7	58.7	74.7	58	40.7	208
A07G0436	AT3G47350.2	hydroxysteroid dehydrogenase 2	6dpa_down	-1.6919	4.38682e-23	561	1478	313	110.7	714	1860	507.3	382.7
A07G0470	AT5G03860.2	malate synthase	6dpa_down	-1.28134	0.00277725	29.3	49.3	66	69	47	44	62.7	178
A07G0750	AT3G22235.2	No annotation	6dpa_down	-1.21055	0.0202493	19	40	35.3	36	76.3	34.3	42.7	88.7
A07G0858	AT5G59990.2	CCT motif family protein	6dpa_down	-3.37509	3.12217e-08	0.3	4	2.3	7	2	3.7	3.7	78.3
A07G1275		No Annotation	6dpa_down	-2.24487	0.000351089	167.7	74.7	39	28.3	212	45.3	59	145.7
A07G1705	AT5G46730.2	glycine-rich protein	6dpa_down	-3.93567	1.77784e-08	13.3	2	8.7	13	18.7	9.3	20.7	213
A07G1713	AT5G35732.1	No annotation	6dpa_down	-1.49513	0.00958126	26.3	17.7	14.3	21.7	31	28.3	39.3	65.3
A07G1774	AT2G31750.1	UdP-glucosyl transferase 74d1	6dpa_down	-1.11133	0.00197969	460.7	312.3	178.3	77.3	504	261.3	164	178.7
A07G2064	AT5G14420.2	RING domain ligase2	6dpa_down	-1.34614	0.0397797	19.7	15.3	18.3	25.7	35.7	21.7	31.3	69.7
A07G2132	AT5G13180.1	NAC domain containing protein 83	6dpa_down	-1.32522	0.020901	128.7	54.7	42	24	162	55.3	32	63.7
A08G0195	AT5G57560.1	Xyloglucan endotransglucosylase/hydrolase family protein	6dpa_down	-3.52993	1.49792e-07	43.7	51.3	16.3	27.7	37.3	42.3	16	341
A08G0371	AT2G47520.1	Integrase-type dNA-binding superfamily protein	6dpa_down	-1.35641	1.00905e-05	52	44.7	27.3	41.7	51.7	39.7	55.3	114
A08G0550	AT3G60420.2	Phosphoglycerate mutase family protein	6dpa_down	-9.47744	1.12667e-34	12.3	19.3	13.3	0	75	79.3	29.7	92
A08G0566		No Annotation	6dpa_down	-1.22211	0.014133	27.7	37.3	24.7	20	64	47	42.3	50
A08G0782	AT2G18700.1	trehalose phosphatase/synthase 11	6dpa_down	-1.63076	0.00178275	155.3	64.7	56	52.7	180.7	57.7	77.3	174.7
A08G0935	AT3G49550.1	No annotation	6dpa_down	-1.24819	0.0152499	93.3	55.3	44	20.3	116	50.3	46.7	52
A08G0999	AT3G61490.3	Pectin lyase-like superfamily protein	6dpa_down	-2.26051	0.0209014	62.3	23.3	9.3	62	101	17.7	11.3	323.3
A08G1537	AT4G16563.1	Eukaryotic aspartyl protease family protein	6dpa_down	-1.47323	0.000118953	575	337.3	279	177	534.7	327	345.3	527.3
A08G1801	AT2G30110.1	ubiquitin-activating enzyme 1	6dpa_down	-1.43847	1.34014e-12	42.3	57.3	62.7	112.7	43.7	122.3	164.3	325.3
A08G2083	AT5G57800.1	Fatty acid hydroxylase superfamily	6dpa_down	-1.85917	7.92036e-09	229.3	987.7	114.7	26.3	204.7	1076.7	78	103
A08G2362	AT3G58190.1	lateral organ boundaries-domain 29	6dpa_down	-4.99036	7.17306e-10	0	0	0	3.7	2.7	0	0	129.3
A08G2558	AT5G60680.1	Protein of unknown function, dUF584	6dpa_down	-1.89518	0.0185655	34.3	13.7	6	15.7	35	13.3	9.3	63.7
A09G0491	AT1G17970.1	RING/U-box superfamily protein	6dpa_down	-1.26844	0.00113767	80.7	66	44.7	30.7	93.3	68	44.7	79
A09G0764	AT5G20630.1	germin 3	6dpa_down	-2.0981	5.04431e-14	25	46	56.3	30.3	34.3	127	177.7	139.7
A09G0776	AT4G26288.1	No annotation	6dpa_down	-2.87242	9.8425e-05	6	5.3	2.3	13	17.3	1	8	103.7
A09G0840	AT3G47340.2	glutamine-dependent asparagine synthase 1	6dpa_down	-2.39953	4.01871e-07	23	29.3	36.3	68.7	56	50.3	44.3	387.3
A09G1374	AT2G36950.1	Heavy metal transport/detoxification superfamily protein	6dpa_down	-1.09224	0.000499337	307.3	210.7	131.7	110.7	301	249	123.7	253.3
A09G1402	AT2G37195.1	No annotation	6dpa_down	-1.09948	1.03966e-08	161.7	102	180.3	130.3	147.7	130.3	243.3	299.7
A09G1403	AT3G45210.1	Protein of unknown function, dUF584	6dpa_down	-1.181	0.0030858	68.7	37	55.7	58.3	78.3	46.7	80.7	141.7
A09G1575	AT1G73680.2	alpha dioxygenase	6dpa_down	-2.18297	1.59708e-07	159	80.3	112.3	225	169	49.3	153	1086.7
A09G1681		No Annotation	6dpa_down	-1.3958	0.00115623	196	105.3	119	95	273.7	101.7	240.3	270
A09G1977	AT1G06620.1	2-oxoglutarate (2OG) and Fe(II)-dependent oxygenase superfamily protein	6dpa_down	-1.12255	0.0101199	2309	1431	357.3	31.7	1938	1175.7	397.7	74
A09G2017	AT3G24310.1	myb domain protein 305	6dpa_down	-2.51238	0.000172421	11	7	4.7	10.3	3.7	5	3.3	64
A09G2092	AT3G06868.1	No annotation	6dpa_down	-1.72863	8.34117e-05	242	206.3	111.7	54.3	266.3	209.3	147.7	191.7
A09G2224	AT3G23360.1	Protein phosphatase 2C family protein	6dpa_down	-1.26989	6.63479e-11	741.7	619.3	131	94.7	739.3	619.3	161.7	245
A09G2394	AT2G18420.1	Gibberellin-regulated family protein	6dpa_down	-1.90229	3.48377e-20	509.3	259.3	135.3	127.3	600.3	305.7	239	508.3
A09G2445	AT4G25320.1	AT hook motif dNA-binding family protein	6dpa_down	-1.71075	3.76172e-13	288	125.7	34.3	56.3	314.7	113	136	197.7
A09G2475	AT3G47340.2	glutamine-dependent asparagine synthase 1	6dpa_down	-2.93619	0.00301935	5	3.3	2	27.3	42.3	0.7	2.3	230
A10G0429	AT1G31310.1	hydroxyproline-rich glycoprotein family protein	6dpa_down	-1.02852	2.35747e-06	675	335.3	206.7	99	775	415	363	217
A10G0588	AT1G52140.1	No annotation	6dpa_down	-1.30389	0.0161739	95	84	77	89.3	99	84	78.7	235
A10G1465		No Annotation	6dpa_down	-1.71336	1.47557e-06	3979	1204.7	1037.7	1068	6267.7	1124.3	1940	3767.7
A10G1552		No Annotation	6dpa_down	-1.37959	0.00265671	30	29.7	34.3	53.7	26	32.3	42.7	150
A10G1726	AT1G13100.1	cytochrome P450, family 71, subfamily B, polypeptide 29	6dpa_down	-1.16016	0.00792683	998	259	79.3	34	1021	207	166.7	81.3
A10G2158		No Annotation	6dpa_down	-3.00337	5.24489e-06	27.3	12.3	13	19	49.3	16.3	22.7	164.7
A10G2169		No Annotation	6dpa_down	-1.13415	9.12607e-19	737	314.3	358.7	228	698.3	380.3	582.7	537.7
A10G2170	AT2G38780.1	No annotation	6dpa_down	-1.10404	2.47951e-06	191.3	93.7	107	91.3	196	91.3	174	210.3
A10G2273		No Annotation	6dpa_down	-1.91437	1.3569e-11	479.7	450.3	123.7	37.7	532.7	515	107.7	153.7
A10G2324		No Annotation	6dpa_down	-1.21027	8.90958e-23	2153.7	3190	556.3	321.3	2282.7	3820	684	796.7
A10G2353		No Annotation	6dpa_down	-7.85399	1.91951e-12	394	28	0	5.7	1646.3	2	0.7	1450.3
A11G0338	AT3G48530.1	SNF1-related protein kinase regulatory subunit gamma 1	6dpa_down	-1.00785	0.000954413	367	226.3	177	175.3	361.3	229	220.7	375.7
A11G0367	AT5G61590.1	Integrase-type dNA-binding superfamily protein	6dpa_down	-2.33035	0.00347394	83	42.3	29	14.7	68	24	42.7	80.3
A11G0400	AT2G18150.1	Peroxidase superfamily protein	6dpa_down	-7.06467	1.81793e-10	0.3	3	1	1.3	8	1.3	1.7	204
A11G0419		No Annotation	6dpa_down	-1.12908	3.69054e-08	262.3	172.3	140.7	91.7	256.7	159	200	215.3
A11G0633	AT5G39610.1	NAC domain containing protein 6	6dpa_down	-2.33301	0.0118188	15.7	3.3	5	22.7	25.7	2.7	1	123.7
A11G0912	AT2G46735.1	No annotation	6dpa_down	-1.11297	0.00518274	128.3	49	49	38.7	122	56	57.3	89.7
A11G0963	AT1G02330.1	No annotation	6dpa_down	-2.93735	1.15778e-72	107.3	92.7	66.3	57	640	605	490	469.3
A11G1721	AT4G36740.1	homeobox protein 40	6dpa_down	-2.0473	0.0153949	1494	564.7	308	448.7	1510.7	509.3	473.3	2028
A11G2003	AT5G54380.1	protein kinase family protein	6dpa_down	-1.09758	0.0441074	108.3	74.7	42.3	33.3	116.7	46.7	52.3	76.7
A11G2071	AT5G15120.1	Protein of unknown function (dUF1637)	6dpa_down	-2.11995	3.24418e-17	179.7	154.7	142.3	47.3	232.7	207	249	221.3
A11G2109	AT3G03870.1	No annotation	6dpa_down	-1.5565	0.00149141	142	92	87	131.3	169	99.7	121.7	416.3
A11G2168	AT3G04070.2	NAC domain containing protein 47	6dpa_down	-3.36936	3.69054e-08	74.3	56	56.3	60.7	120.7	50.7	84	679.3
A11G2379		No Annotation	6dpa_down	-1.08485	0.013812	77.3	57.7	36.3	33	92.7	62.7	50	75
A11G2395	AT1G08980.1	amidase 1	6dpa_down	-1.12344	0.00054732	266.7	196.3	180	137.3	374.7	208.3	213	321.7
A11G2926	AT5G59080.1	No annotation	6dpa_down	-2.41365	3.6743e-05	25	12	7	20.3	48	15	23.3	117.3
A11G2997	AT1G32700.2	PLATZ transcription factor family protein	6dpa_down	-2.28944	0.0334383	14.3	4.3	2.3	29	31.7	0	3.3	156
A11G3049	AT2G45600.1	alpha/beta-Hydrolases superfamily protein	6dpa_down	-1.32906	6.42771e-06	87.7	333	256.3	44	90.3	315.3	333	119
A12G0144	AT2G22570.2	nicotinamidase 1	6dpa_down	-1.51217	1.5481e-05	69.3	120.7	148	121.3	88.3	135	214.3	371.7
A12G0187	AT4G34260.1	1,2-alpha-L-fucosidases	6dpa_down	-1.13881	0.00124985	30.7	38.7	51	38	35.7	34.7	76.7	90.3
A12G0237	AT2G15890.2	maternal effect embryo arrest 14	6dpa_down	-1.034	0.0324405	148.7	92	76.3	137	207	84.7	137.3	302.7
A12G0331	AT2G16980.2	Major facilitator superfamily protein	6dpa_down	-1.19016	0.00631385	42.3	33	34.7	27	46.7	63.7	68	66.3
A12G0495	AT1G67100.1	LOB domain-containing protein 40	6dpa_down	-1.26128	2.28232e-20	971.3	455.7	403.3	203	862	434.3	592	520.3
A12G0907	AT5G13800.1	pheophytinase	6dpa_down	-1.24159	0.00252308	400.7	164	115.7	91	483.3	172.3	171.7	228.3
A12G1091	AT1G02530.1	P-glycoprotein 12	6dpa_down	-1.75832	0.000102565	5	6	10	49.3	26.7	10	10	177.3
A12G1143	AT3G62550.1	Adenine nucleotide alpha hydrolases-like superfamily protein	6dpa_down	-1.13776	0.000526919	302.3	263	227	253	343.7	283.7	392	594
A12G1296	AT2G33510.2	No annotation	6dpa_down	-1.11079	0.0240586	239	121.7	67.7	23	232	119.3	69.3	53.3
A12G1505	AT1G69490.1	NAC-like, activated by AP3/PI	6dpa_down	-4.8108	2.6104e-10	1.7	2.7	0.7	3.3	4	2.3	2.7	103
A12G1550	AT1G25550.1	myb-like transcription factor family protein	6dpa_down	-1.38337	0.0198836	27	10.3	18.3	21.3	21.7	12.7	17.7	59.7
A12G1909	AT5G46580.1	pentatricopeptide (PPR) repeat-containing protein	6dpa_down	-1.44481	3.40488e-05	157.7	123.7	87.3	32.3	173.3	116.3	104.7	94.7
A12G2012	AT1G62770.1	Plant invertase/pectin methylesterase inhibitor superfamily protein	6dpa_down	-1.18834	0.0431604	23	24	14	23.3	37.7	16.3	20.7	56.3
A12G2067	AT1G12780.1	UdP-d-glucose/UdP-d-galactose 4-epimerase 1	6dpa_down	-2.12482	3.94981e-05	52	44	31.3	28	58	33.7	26.3	129.7
A12G2151	AT5G24310.1	ABL interactor-like protein 3	6dpa_down	-2.12555	2.17183e-05	164	199	33.3	18.3	206.7	275.3	49.7	86.7
A12G2363	AT5G51970.2	GroES-like zinc-binding alcohol dehydrogenase family protein	6dpa_down	-1.54689	0.00122024	176	81	66	81.7	219.7	68	71	256.3
A12G2364	AT5G51970.2	GroES-like zinc-binding alcohol dehydrogenase family protein	6dpa_down	-1.33592	0.0161982	60.7	32	23.3	35	72.7	29.7	27	95
A12G2365	AT5G51970.2	GroES-like zinc-binding alcohol dehydrogenase family protein	6dpa_down	-3.63929	8.08059e-07	14.7	10.3	4	8.3	15.3	6.3	10	112
A12G2603	AT3G61060.1	phloem protein 2-A13	6dpa_down	-2.09789	0.00612353	10	9.7	9	12.7	19	14.3	10.3	58.3
A13G0153	AT2G40000.1	ortholog of sugar beet HS1 PRO-1 2	6dpa_down	-1.59323	0.000666961	148.7	75.3	90.7	110.3	111.7	65.7	89.7	357
A13G0343	AT1G49620.1	Cyclin-dependent kinase inhibitor family protein	6dpa_down	-1.07034	0.0349984	56.3	277.7	138.7	23.7	51.7	314.7	276.7	53.3
A13G0368	AT1G47900.2	Plant protein of unknown function (dUF869)	6dpa_down	-1.55583	0.00105418	95.7	76	53.7	29.7	94.3	53.3	58.3	93
A13G0375	AT4G34160.1	CYCLIN d3;1	6dpa_down	-1.0885	1.37152e-21	1818.7	1191.7	601	364.3	2150	1435	764.7	830.7
A13G0500	AT4G03210.2	xyloglucan endotransglucosylase/hydrolase 9	6dpa_down	-2.15656	2.18705e-05	1049.7	731	407	235.3	837	675.7	498	1127
A13G0544	AT3G19990.1	No annotation	6dpa_down	-1.06938	0.0222401	46.7	24.3	24.3	36	38.3	27	42	80.7
A13G0548	AT5G23450.3	long-chain base (LCB) kinase 1	6dpa_down	-1.05767	0.000224112	61.3	105.7	67	62	113.7	131.3	142.7	138.3
A13G0689	AT3G01142.1	other RNA	6dpa_down	-1.6775	2.35193e-05	837.7	246.7	18	20.7	819.7	230.7	19	71.3
A13G0743	AT1G69210.2	Uncharacterised protein family UPF0090	6dpa_down	-1.45391	1.87545e-05	164.3	194.3	162.3	183	231.7	177.3	190	535.7
A13G1308	AT1G78440.1	Arabidopsis thaliana gibberellin 2-oxidase 1	6dpa_down	-2.3157	0.0284042	78	66.7	24	180.3	147	69	29	986.3
A13G1352		No Annotation	6dpa_down	-1.74107	2.50071e-72	1655	268.3	144.3	525	1982.7	673.7	858	1884
A13G1409	AT1G28760.1	Uncharacterized conserved protein (dUF2215)	6dpa_down	-1.89512	7.09483e-31	173.3	143.7	84	95.3	694.3	434.7	300.3	380.7
A13G1719	AT2G19572.1	No annotation	6dpa_down	-1.25062	0.000256586	937	729.3	522.7	418.3	744.7	591.3	594.3	1058.3
A13G2032	AT1G10460.1	germin-like protein 7	6dpa_down	-1.2476	0.0498285	29.7	14	13.3	21.3	28.3	21.7	12	54.7
A13G2034	AT1G07150.2	mitogen-activated protein kinase kinase kinase 13	6dpa_down	-2.26903	0.000326046	35.7	28.3	17	15.3	66.3	23.7	14.3	78.7
A13G2296	AT3G05858.1	No annotation	6dpa_down	-2.45139	6.63441e-06	196.3	96	64.7	64	200.3	93	104.3	377
D01G0154	AT1G66620.1	Protein with RING/U-box and TRAF-like domains	6dpa_down	-1.51763	0.0482115	39.7	21	15.7	18.7	53	14	21.3	57.3
D01G0503	AT4G27450.1	Aluminium induced protein with YGL and LRdR motifs	6dpa_down	-1.6195	0.000152678	579.7	283.3	290.7	251	622.3	262	416	826
D01G0514	AT1G52890.1	NAC domain containing protein 19	6dpa_down	-1.48576	0.00499066	124.7	33	30.7	31	126.3	24	47.3	92
D01G0565	AT5G54590.2	Protein kinase superfamily protein	6dpa_down	-1.01462	0.000372203	761.7	567.7	384.7	336	921	534.7	515	727.3
D01G0819	AT1G16290.1	No annotation	6dpa_down	-9.68689	7.11032e-40	42.7	2.3	17.3	0	32	61.3	28	106.7
D01G0820	AT4G00231.1	ARM repeat superfamily protein	6dpa_down	-6.84293	2.16376e-47	72.3	10.3	21.7	1	76	124	58.3	137.7
D01G0822	AT1G16270.2	Protein kinase superfamily protein with octicosapeptide/Phox/Bem1p domain	6dpa_down	-12.8727		483.3	33.3	141	0	512	736	324.7	970.3
D01G0823	AT1G66350.1	RGA-like 1	6dpa_down	-9.49991	2.89645e-35	0	0	14	0	0.3	13.7	20.7	93.7
D01G0824	AT1G56170.2	nuclear factor Y, subunit C2	6dpa_down	-11.0762	4.04531e-103	295	27.7	57.3	0	301.7	252	118.7	279.3
D01G0827	AT1G79440.1	aldehyde dehydrogenase 5F1	6dpa_down	-7.39199	2.76871e-203	166.7	17.7	113.7	3.3	176.3	247.3	218.3	622.3
D01G0906	AT1G20450.2	dehydrin family protein	6dpa_down	-1.95443	0.000510439	66.3	60.7	79.7	104	68.7	39	72	434
D01G0978		No Annotation	6dpa_down	-1.13989	0.0225495	632.3	269	210.3	237.7	793	248	362	567
D01G1675	AT1G47670.1	Transmembrane amino acid transporter family protein	6dpa_down	-2.70942	4.76291e-06	14	26	22.3	25.7	14.3	24	18.7	180.7
D01G1852	AT5G22640.2	MORN (Membrane Occupation and Recognition Nexus) repeat-containing protein	6dpa_down	-1.06143	0.00386112	87	21.3	22.3	131	250.7	13.3	96	295.3
D01G2158	AT2G39800.3	delta1-pyrroline-5-carboxylate synthase 1	6dpa_down	-2.8211	9.28215e-05	16.3	4.7	9.3	11.3	46.3	12.3	23.3	86
D01G2338	AT1G78850.1	d-mannose binding lectin protein with Apple-like carbohydrate-binding domain	6dpa_down	-9.81617	5.59238e-24	0.3	0	0	0.3	2	1.7	0	431.7
D02G0804	AT4G08300.1	nodulin MtN21 /EamA-like transporter family protein	6dpa_down	-2.03495	0.0020316	78.3	45	28.3	18.7	64.3	29	32.7	81
D02G0834	AT1G22250.1	No annotation	6dpa_down	-1.06307	1.53962e-08	447.7	160.3	95	115	578	214	209.3	258.3
D02G1153	AT1G13260.1	related to ABI3/VP1 1	6dpa_down	-1.11089	0.0378714	29	20	22.3	21	23.7	24.7	34.7	49
D02G1259	AT1G69600.1	zinc finger homeodomain 1	6dpa_down	-1.62984	0.00087554	56	35	32	24.7	58	37	24.3	81.7
D02G1346	AT1G05260.1	Peroxidase superfamily protein	6dpa_down	-2.34078	0.00101846	15.3	9	3.7	36.7	18.3	18.3	10.7	201.3
D02G1540	AT3G09720.1	P-loop containing nucleoside triphosphate hydrolases superfamily protein	6dpa_down	-1.16325	0.000164739	314	164	128.7	63.7	302.7	185.3	120.7	153.7
D02G1693		No Annotation	6dpa_down	-1.21836	0.00163159	5.7	22.3	46.3	33	8.3	49.7	90.3	83
D02G1728	AT1G68510.1	LOB domain-containing protein 42	6dpa_down	-1.18136	4.7903e-05	47.3	46	61	55	81	58.3	72.3	133.3
D02G1767	AT5G13170.1	senescence-associated gene 29	6dpa_down	-3.54075	2.07955e-12	44	41.7	55.7	84.7	156.3	47.7	62.7	1044
D02G1861		No Annotation	6dpa_down	-1.18185	0.000445069	116	98.3	87	49.3	112.7	98.7	101.7	120
D02G1869	AT4G10270.1	Wound-responsive family protein	6dpa_down	-1.88555	2.96688e-17	215.3	82.3	85.3	50.7	187.7	86	153.7	201.3
D02G1871	AT4G10270.1	Wound-responsive family protein	6dpa_down	-1.14591	4.88338e-21	959.7	451	485	257.7	814.3	450.7	748.3	612
D02G1872	AT4G10270.1	Wound-responsive family protein	6dpa_down	-1.60963	9.67103e-05	68	30.7	38.3	20.3	60.3	42.7	75	66.7
D02G1873	AT4G10265.1	Wound-responsive family protein	6dpa_down	-1.23995	0.01275	37	113	122	22	33	128	168.7	56.3
D03G0269	AT1G70210.1	CYCLIN d1;1	6dpa_down	-1.5417	0.00125537	234.3	136.3	114.7	42.3	257.3	149.3	160	134
D03G0343	AT5G10100.2	Haloacid dehalogenase-like hydrolase (HAd) superfamily protein	6dpa_down	-2.17402	4.18786e-05	70	45	38.7	46	109.7	39	64	223.7
D03G0693	AT1G64080.1	No annotation	6dpa_down	-1.09084	0.048206	209.7	140	126.3	21.7	196	134.3	176.7	49.3
D03G0790	AT4G04190.2	No annotation	6dpa_down	-8.21435	4.80639e-51	151	72.3	46.3	0.3	77	79.7	34.3	144.7
D03G1074	AT5G63560.1	HXXXd-type acyl-transferase family protein	6dpa_down	-1.5442	0.00133668	43.3	26.3	20	27	66	22.3	20.3	84.7
D03G1135		No Annotation	6dpa_down	-1.49816	0.00327465	26.3	22	19	17.7	67.3	29.3	37.7	53.7
D03G1358	AT3G21755.2	other RNA	6dpa_down	-1.98403	1.97983e-06	65.3	101.7	79	19	69.3	114	140.3	80.7
D03G1371	AT2G38470.1	WRKY dNA-binding protein 33	6dpa_down	-1.39506	0.0185655	78	41.7	22	26	87.7	26.3	18	73.7
D03G1709	AT3G57380.1	Glycosyltransferase family 61 protein	6dpa_down	-1.05114	0.0278708	155.7	82.7	52.7	46.3	176.3	73.3	77.3	102.7
D03G1715	AT4G17040.1	CLP protease R subunit 4	6dpa_down	-1.99418	8.41435e-12	186.7	160.7	86.3	32.7	225.7	153.3	145	139.7
D04G0208		No Annotation	6dpa_down	-1.18719	8.39194e-06	166.3	633.7	120.7	57.3	133.3	653.3	143.7	140
D04G0209	AT1G65295.1	No annotation	6dpa_down	-1.57385	5.38429e-12	228	535.3	218	58.7	298	642.7	256	187.3
D04G0469	AT5G39890.1	Protein of unknown function (dUF1637)	6dpa_down	-1.00603	5.48012e-14	526.7	350	287	203	562	368.3	366.7	437.3
D04G1066	AT5G60800.2	Heavy metal transport/detoxification superfamily protein	6dpa_down	-1.37454	0.00421952	40.7	33	25.7	46.7	40.7	29.3	24	129.7
D04G1176	AT5G02230.2	Haloacid dehalogenase-like hydrolase (HAd) superfamily protein	6dpa_down	-1.56786	0.000152514	281	182.7	180.7	248.7	388	255	350.7	780.3
D04G1329	AT1G10370.1	Glutathione S-transferase family protein	6dpa_down	-2.64558	0.000263523	18.3	20.3	12	19.7	22	17.7	15.7	128.7
D04G1388	AT3G49210.1	O-acyltransferase (WSd1-like) family protein	6dpa_down	-1.40177	1.08568e-11	759.7	128.3	57.3	78.7	830	112.3	128	223.3
D04G1402	AT1G19310.1	RING/U-box superfamily protein	6dpa_down	-2.27233	0.00715514	15.7	9	9	14.7	17.3	7.3	13.7	76.7
D04G1520	AT5G64260.1	EXORdIUM like 2	6dpa_down	-1.61432	1.70488e-13	5595	3328.7	1835.3	323.3	4815	3180	2076.3	1055.3
D04G1687	AT3G26070.1	Plastid-lipid associated protein PAP / fibrillin family protein	6dpa_down	-1.48052	0.00619829	216.7	97.3	62	29.3	217.7	80.7	84.3	87.7
D04G1847		No Annotation	6dpa_down	-1.63927	3.62081e-07	94.3	76.3	43	34.3	102.3	94	145	115.7
D05G0263	AT5G56590.1	O-Glycosyl hydrolases family 17 protein	6dpa_down	-1.84157	3.69346e-05	163.7	20	1	15.7	144.7	4	4	60.3
D05G0541	AT5G48930.1	hydroxycinnamoyl-CoA shikimate/quinate hydroxycinnamoyl transferase	6dpa_down	-1.09755	0.0494592	41.3	46.3	35.7	35	72.7	45.7	35.3	79.7
D05G0767	AT3G63470.1	serine carboxypeptidase-like 40	6dpa_down	-1.32393	0.00173463	0	0	32.7	24.7	0	0.3	24	66.7
D05G0905	AT5G02020.2	No annotation	6dpa_down	-1.48394	0.0191773	94.7	53.7	38.3	23.7	116.3	47.3	41.7	70.3
D05G1016	AT2G30040.1	mitogen-activated protein kinase kinase kinase 14	6dpa_down	-1.30926	0.0001697	109.3	93	68	67.7	131	84.7	82	179.3
D05G1126	AT1G80920.1	Chaperone dnaJ-domain superfamily protein	6dpa_down	-1.18841	0.00171925	522.7	224.3	182	151.7	478.7	222.7	260	371.3
D05G1158	AT1G15780.1	No annotation	6dpa_down	-1.13109	0.00037421	778.3	400	305	346	1094	346	391.7	813.7
D05G1174	AT1G80080.1	Leucine-rich repeat (LRR) family protein	6dpa_down	-1.16087	0.00427638	135.7	334.3	272	30	170	346	251.7	72
D05G1208	AT1G80130.1	Tetratricopeptide repeat (TPR)-like superfamily protein	6dpa_down	-1.31607	0.0114514	103	60.3	53.7	85	120.3	49.7	65.3	228
D05G1600	AT1G11530.1	C-terminal cysteine residue is changed to a serine 1	6dpa_down	-1.14812	5.4938e-14	522.7	275.3	232.3	196.7	574.7	255.7	308	466.3
D05G1644	AT1G05100.1	mitogen-activated protein kinase kinase kinase 18	6dpa_down	-1.46636	0.000189882	243.7	138	42	25.7	279.7	155.7	39.7	76.7
D05G1663	AT1G12010.1	2-oxoglutarate (2OG) and Fe(II)-dependent oxygenase superfamily protein	6dpa_down	-2.50004	6.26644e-05	200	184.7	146.3	590.7	748.3	156.3	151.3	3605.7
D05G1773	AT1G20030.1	Pathogenesis-related thaumatin superfamily protein	6dpa_down	-1.07565	0.00908937	49.7	88.3	82.3	135.3	103	110.7	58.3	303.3
D05G2010	AT3G49940.1	LOB domain-containing protein 38	6dpa_down	-1.07871	0.00386205	70	31.7	34.3	40.7	74	22.7	29	91.7
D05G2114	AT4G33580.2	beta carbonic anhydrase 5	6dpa_down	-2.67342	0.038456	43	5	1.7	14.3	78.7	0.3	2.3	100.7
D05G2186	AT1G35910.1	Haloacid dehalogenase-like hydrolase (HAd) superfamily protein	6dpa_down	-1.3658	9.74776e-11	170	144.3	147	82	150.3	127.7	210.7	227
D05G2340	AT1G71697.1	choline kinase 1	6dpa_down	-1.96874	0.00162332	145.7	72	40.7	49.3	185	55	51.3	208.3
D05G2349	AT3G27950.1	GdSL-like Lipase/Acylhydrolase superfamily protein	6dpa_down	-1.47142	0.00316837	85.7	62.3	46	70.7	102.3	55	51.7	209.3
D05G2394	AT1G71691.1	GdSL-like Lipase/Acylhydrolase superfamily protein	6dpa_down	-1.36848	1.12508e-05	117.3	212.7	93	40.7	140	305.3	154	113
D05G2479	AT1G75030.1	thaumatin-like protein 3	6dpa_down	-1.36926	0.00678875	91	58.3	11.7	19	85.7	41.3	8	52.7
D05G2515	AT5G65780.1	branched-chain amino acid aminotransferase 5 / branched-chain amino acid transaminase 5 (BCAT5)	6dpa_down	-4.14161	2.02684e-07	1.3	1.7	1.7	5	16.7	1.7	5.7	96.3
D05G2593	AT5G41890.1	GdSL-like Lipase/Acylhydrolase superfamily protein	6dpa_down	-1.53794	0.000349703	39.7	23	21.3	21.7	54.7	85	86.3	67.7
D05G2919	AT2G40300.1	ferritin 4	6dpa_down	-1.39073	0.0028892	51.3	29.3	18	32.3	84.7	23.7	24	91
D05G3268	AT2G48060.1	No annotation	6dpa_down	-1.02087	0.0271172	81	36.3	22.3	35	95	37	30.3	76.3
D05G3312	AT1G16670.1	Protein kinase superfamily protein	6dpa_down	-1.24533	0.00734194	75.3	49	37.3	25.7	91.3	46.7	40.3	65.3
D05G3387	AT1G28130.2	Auxin-responsive GH3 family protein	6dpa_down	-2.1242	1.62085e-12	54.3	4.3	1	30	74.3	0.7	0.7	141.3
D05G3434		No Annotation	6dpa_down	-1.18855	5.48793e-05	137.7	184.3	113	71.7	238	130.7	186.7	175
D05G3480		No Annotation	6dpa_down	-1.2222	0.00851045	34	35.3	24.7	22.7	24.3	33.7	28.7	57
D05G3672	AT3G09950.1	No annotation	6dpa_down	-1.34624	4.29651e-10	1681	723	529.7	195	1889.3	748.3	1043.7	531.7
D06G0232	AT5G49630.1	amino acid permease 6	6dpa_down	-1.89027	0.00194082	24	28.3	16.7	21	33.7	21.7	21.7	84
D06G0289	AT5G65310.2	homeobox protein 5	6dpa_down	-1.18833	2.10873e-07	597.3	428.3	268.7	190	759	428.3	290.7	463.3
D06G0357	AT1G22070.1	TGA1A-related gene 3	6dpa_down	-1.11854	0.0098626	39.7	36.7	22.7	28.7	62.3	32.3	42.7	66.7
D06G0375		No Annotation	6dpa_down	-4.16931	1.93181e-05	51	7	1	10	71	1.3	0.7	198.3
D06G0415	AT1G44160.1	HSP40/dnaJ peptide-binding protein	6dpa_down	-1.67195	0.000128453	98.3	57	43.3	36.7	114.3	61	89.7	126.3
D06G0772	AT2G06255.1	ELF4-like 3	6dpa_down	-1.67468	3.76116e-05	420.3	153	65.7	41	385	141.7	107	141
D06G1281	AT5G44400.1	FAd-binding Berberine family protein	6dpa_down	-1.64078	2.52756e-07	132	81.7	64.3	35.3	124	76.7	78.7	119.3
D06G1302	AT4G23280.1	cysteine-rich RLK (RECEPTOR-like protein kinase) 20	6dpa_down	-1.79888	1.01281e-05	145.7	75.3	54.3	47.3	156.3	57.3	71.7	175.7
D06G1400	AT1G28330.5	dormancy-associated protein-like 1	6dpa_down	-1.00562	0.00473369	3418.7	1397.7	1324.3	908.3	3568.7	1217	2144	1971.3
D06G1628		No Annotation	6dpa_down	-1.25575	0.00117433	160.3	36.7	17.7	31.3	209	38.3	50.7	80
D06G2078	AT5G48930.1	hydroxycinnamoyl-CoA shikimate/quinate hydroxycinnamoyl transferase	6dpa_down	-1.21096	0.000389912	38	19.7	24.7	38.3	91	68	54.3	95
D06G2196	AT4G27290.1	S-locus lectin protein kinase family protein	6dpa_down	-1.78539	0.000229397	35.7	11.7	8.3	16.3	47	16.3	12	60.7
D06G2316	AT1G12860.1	basic helix-loop-helix (bHLH) dNA-binding superfamily protein	6dpa_down	-1.19285	0.00554515	189.3	88.7	58.3	31.7	210	88.3	75.3	77.3
D07G0457	AT5G51100.1	Fe superoxide dismutase 2	6dpa_down	-1.12601	8.86425e-11	83	117.7	125.7	134	112	215.7	265.7	313.3
D07G0783	AT3G30180.1	brassinosteroid-6-oxidase 2	6dpa_down	-2.11232	6.72083e-07	721	257.3	100	60.7	737	183.3	109.7	278.7
D07G0802	AT2G43000.1	NAC domain containing protein 42	6dpa_down	-1.35122	0.00176849	83	76	50.3	27	71.3	67.3	46.3	73.3
D07G1030	AT3G47340.2	glutamine-dependent asparagine synthase 1	6dpa_down	-2.79536	2.00439e-08	1633.7	933.7	576.3	660.3	1774.7	790.7	653	4906
D07G1077	AT2G37700.2	Fatty acid hydroxylase superfamily	6dpa_down	-3.25746	0.00112212	12.3	5	2.3	28.3	30.3	8	1.7	297.7
D07G1161	AT1G11310.2	Seven transmembrane MLO family protein	6dpa_down	-1.28033	0.0488947	317.7	88	28	27.3	270.7	82.3	45	70
D07G1624	AT4G12800.1	photosystem I subunit l	6dpa_down	-1.11361	0.00969595	215.3	135.3	121	52.7	163.7	116.3	136.7	122
D07G2461		No Annotation	6dpa_down	-1.04291	7.28763e-23	2651.3	12353.3	5993.7	489.3	2795.7	13675.7	6521.3	1082.7
D08G0461	AT2G47520.1	Integrase-type dNA-binding superfamily protein	6dpa_down	-1.23941	4.70527e-05	36.3	32.3	32	50	50	47.7	51.7	126
D08G0536	AT2G30550.2	alpha/beta-Hydrolases superfamily protein	6dpa_down	-1.25212	0.000817973	76.3	70.7	64	39.3	100.7	71.7	94	100
D08G0936	AT2G18700.1	trehalose phosphatase/synthase 11	6dpa_down	-2.09575	0.0070484	133.7	39.3	28.7	32.7	140.7	33.7	45.3	152.3
D08G1272	AT3G61490.3	Pectin lyase-like superfamily protein	6dpa_down	-2.73752	0.00198853	53.7	49.3	51.3	186	223	56	48.7	1352.3
D08G1352	AT1G02520.1	P-glycoprotein 11	6dpa_down	-1.31403	0.0108831	101.3	76.7	60	77	118	59.3	66.3	205
D08G1555	AT3G60220.1	TOXICOS EN LEVAdURA 4	6dpa_down	-1.44336	5.25219e-06	257	264.7	128.3	36	248	280	151.7	105.3
D08G1840	AT1G62530.2	Plant protein of unknown function (dUF863)	6dpa_down	-1.13586	1.40495e-05	325.7	222	183.3	120.3	334.3	261	287.7	283.7
D08G1862	AT2G01610.1	Plant invertase/pectin methylesterase inhibitor superfamily protein	6dpa_down	-3.56308	2.689e-06	2.3	3.3	3.7	11.3	5	2	4	144.3
D08G1871	AT4G22730.1	Leucine-rich repeat protein kinase family protein	6dpa_down	-1.11766	0.0260307	340.3	192.7	151.3	145.7	429.3	168.3	187	340
D08G2033	AT3G48520.1	cytochrome P450, family 94, subfamily B, polypeptide 3	6dpa_down	-1.23161	0.00474705	81	68	48	32	63	46	46.7	80.3
D08G2049	AT4G28530.2	NAC domain containing protein 74	6dpa_down	-4.09264	0.00060715	0	2.7	1.3	3.7	4.7	0.7	3.7	69.7
D08G2646	AT5G57800.1	Fatty acid hydroxylase superfamily	6dpa_down	-2.11395	3.15392e-25	478.7	2493.3	844	58	351.3	3078.3	683.7	269.7
D09G0022		No Annotation	6dpa_down	-3.85332	1.28289e-60	62.7	102.3	40.7	21.3	286.3	232	168.7	334
D09G0059	AT5G63860.1	Regulator of chromosome condensation (RCC1) family protein	6dpa_down	-1.00553	2.21066e-06	274	438.7	251	126.7	341.7	564	382.7	272.3
D09G0361	AT3G01900.1	cytochrome P450, family 94, subfamily B, polypeptide 2	6dpa_down	-1.15512	6.91633e-05	292.3	154.7	80.7	54.7	312.3	136.7	99	130.3
D09G0498	AT1G17970.1	RING/U-box superfamily protein	6dpa_down	-1.52711	0.0111463	64	47.3	31.7	22.3	96.3	52	33.3	69
D09G0776	AT4G26288.1	No annotation	6dpa_down	-3.4297	1.49792e-07	24	6.3	11.3	10.7	41	18.3	10.3	125.7
D09G0861	AT3G47340.2	glutamine-dependent asparagine synthase 1	6dpa_down	-2.77254	0.00513639	157.7	78.7	33	247	380	60.3	63	1848.3
D09G1028	AT3G05600.1	alpha/beta-Hydrolases superfamily protein	6dpa_down	-1.4562	0.0191418	61.7	24	32.7	31.3	55.7	28.3	23.3	91.7
D09G1224	AT3G28210.1	zinc finger (AN1-like) family protein	6dpa_down	-1.21561	0.00969643	169	105.3	85	91.3	162.7	96.3	95	227
D09G1776		No Annotation	6dpa_down	-1.36174	0.00105418	857	445.7	335	140.3	859	419.3	507.3	389
D09G2298	AT5G49100.1	No annotation	6dpa_down	-2.59909	0.000564642	13.7	18	17.3	13.3	19	34.7	27	88
D10G0177	AT1G61680.2	terpene synthase 14	6dpa_down	-3.00746	0.00382635	88.7	14	3	8.3	93	4.7	3	74
D10G0211	AT1G61050.1	alpha 1,4-glycosyltransferase family protein	6dpa_down	-1.87557	0.000340019	182.7	102.7	45.7	16.3	177	76.7	46.3	64.3
D10G0567	AT3G58310.1	domain of unknown function (dUF26)	6dpa_down	-1.54461	0.00408708	0	279.7	313	18.3	0.7	359.7	358	57.7
D10G0633	AT3G16330.1	No annotation	6dpa_down	-1.08631	0.000213393	185.7	128.3	80.3	88	178.7	114.3	106.7	199.7
D10G0834	AT3G27580.2	Protein kinase superfamily protein	6dpa_down	-1.03604	0.0244267	141.3	140	74.3	40.7	174	136	70	89.7
D10G1141		No Annotation	6dpa_down	-10.4615	2.93041e-66	9	2.7	1.3	0	44	25.7	97.7	182
D10G1707	AT4G02380.2	senescence-associated gene 21	6dpa_down	-3.01284	8.35478e-09	579	375.7	128.7	50.3	711	430.7	227.7	430.3
D10G1768	AT3G16910.1	acyl-activating enzyme 7	6dpa_down	-1.0335	4.6084e-06	480	320.7	231.3	212.7	545	298.7	277.3	466.7
D10G1801		No Annotation	6dpa_down	-4.03409	6.86621e-10	3	5.7	2.7	12.3	2.3	2.3	6.7	218.7
D10G2150	AT5G04530.1	3-ketoacyl-CoA synthase 19	6dpa_down	-1.49074	1.79352e-09	599.3	1699.3	456.3	55	682	1723.3	395	166.3
D10G2219		No Annotation	6dpa_down	-2.55107	0.036554	238.3	8.7	0	29	731	1	16.7	185.3
D10G2363	AT2G40000.1	ortholog of sugar beet HS1 PRO-1 2	6dpa_down	-3.22788	1.23278e-06	132.3	40.3	22.3	19.3	107.3	28	31.3	195
D10G2406		No Annotation	6dpa_down	-3.14156	1.10326e-05	27.3	15	11.7	23.7	42.3	10	13	226
D11G0133	AT5G53110.1	RING/U-box superfamily protein	6dpa_down	-3.05346	0.00254153	0.7	0	0.3	10.3	10.7	0	0	94.3
D11G0294	AT1G32700.2	PLATZ transcription factor family protein	6dpa_down	-2.56921	0.000776591	87	19.7	14.3	20	116.7	13	19.7	129
D11G0394	AT3G48530.1	SNF1-related protein kinase regulatory subunit gamma 1	6dpa_down	-1.50331	0.000100473	253.3	151	130.3	99.3	276	143.7	136.3	303
D11G0484		No Annotation	6dpa_down	-1.74771	3.71713e-16	357	176.3	164.3	61.7	333	192.7	223	223.3
D11G0667		No Annotation	6dpa_down	-1.67945	1.44084e-15	665.7	706	100.3	84.3	791.7	767.7	205.3	289
D11G0743	AT5G39610.1	NAC domain containing protein 6	6dpa_down	-1.61923	0.000140467	9.7	61.3	119.7	185.3	47.7	65	117	612
D11G1270	AT4G00910.1	Aluminium activated malate transporter family protein	6dpa_down	-1.01056	0.0244972	14	23	63.7	37.7	21.7	14.3	66	82
D11G1272	AT3G53090.2	ubiquitin-protein ligase 7	6dpa_down	-1.01481	4.82805e-06	545	248.3	163.3	169.7	613	236.7	239.3	366
D11G1879	AT4G36740.1	homeobox protein 40	6dpa_down	-2.06996	0.041283	466	227	271	625	665.7	295.7	479	2873.7
D11G2376	AT5G15120.1	Protein of unknown function (dUF1637)	6dpa_down	-1.63341	1.06227e-16	300.7	216	221.7	79.3	357.7	268.3	320.3	264
D11G2420	AT3G03870.1	No annotation	6dpa_down	-1.38204	0.00165283	73.7	55.7	60.7	88.3	89.3	52.7	75	245.7
D11G2469	AT3G04070.2	NAC domain containing protein 47	6dpa_down	-3.35295	6.54618e-06	7	6.7	13.3	36	27.7	8.7	19	401
D11G2613		No Annotation	6dpa_down	-4.79217	3.84692e-11	25	7.7	2.3	6.7	38.3	8	7	202
D11G2791	AT3G62550.1	Adenine nucleotide alpha hydrolases-like superfamily protein	6dpa_down	-1.14868	1.31833e-05	228	140	90.7	59.3	225.7	109.7	130.3	141
D11G2792	AT3G62550.1	Adenine nucleotide alpha hydrolases-like superfamily protein	6dpa_down	-1.0152	4.28925e-13	1044.7	524	429.3	210	994.3	536.3	511	454.7
D11G3009	AT1G56220.4	dormancy/auxin associated family protein	6dpa_down	-1.70773	0.0100811	71.3	28.3	12	17.7	81	27.3	32.7	62.3
D11G3310	AT2G37760.5	NAd(P)-linked oxidoreductase superfamily protein	6dpa_down	-1.3214	0.00675609	73.7	48	41.3	37.3	72.3	42	47	99.7
D11G3464	AT4G33985.1	Protein of unknown function (dUF1685)	6dpa_down	-2.23001	0.000210695	21.7	32.3	30.3	53.3	45.7	30.3	60	271.7
D11G3512	AT4G28530.2	NAC domain containing protein 74	6dpa_down	-1.2065	0.0237587	100.3	59.3	41	43.7	101	48.7	54	107.3
D12G0066	AT3G63010.1	alpha/beta-Hydrolases superfamily protein	6dpa_down	-1.03598	0.0366428	297	136.7	83.7	72.7	396.3	107.7	99.3	158.7
D12G0132	AT5G64530.1	xylem NAC domain 1	6dpa_down	-1.14606	0.0243272	194.3	70.7	43.7	24.3	208.3	59.3	57.3	57.7
D12G0159	AT2G22570.2	nicotinamidase 1	6dpa_down	-1.46073	7.9071e-05	91.3	144.3	113	77.3	135.3	128	166	227
D12G0236	AT2G15890.2	maternal effect embryo arrest 14	6dpa_down	-1.23764	8.90228e-05	285	187.7	185.3	189.3	387	225.7	259.7	480
D12G0375	AT3G06460.1	GNS1/SUR4 membrane protein family	6dpa_down	-1.8511	1.90015e-06	1	1048.7	1332.3	18.3	1.7	1155.7	1458.3	71.3
D12G0503	AT1G67100.1	LOB domain-containing protein 40	6dpa_down	-1.20225	2.62903e-25	2225.7	1079.7	868	429.3	1944.3	1000	1148	1060
D12G0625	AT2G18570.1	UdP-Glycosyltransferase superfamily protein	6dpa_down	-1.18145	0.0218607	49.3	71.7	74.3	56.3	72.3	75.7	112	136.7
D12G0806	AT5G13870.1	xyloglucan endotransglucosylase/hydrolase 5	6dpa_down	-2.17323	0.000519886	7.7	16.3	14	19.3	8.3	16.7	29.3	93.7
D12G0841	AT2G03890.2	phosphoinositide 4-kinase gamma 7	6dpa_down	-1.63958	0.00111577	149.3	56	49	44.7	184	74.7	86.3	150
D12G1002	AT3G14460.1	LRR and NB-ARC domains-containing disease resistance protein	6dpa_down	-1.13023	0.00338166	161.3	92.7	64	75.3	174.3	78	91.3	177.7
D12G1264	AT3G62550.1	Adenine nucleotide alpha hydrolases-like superfamily protein	6dpa_down	-2.09846	1.64894e-05	157	97.7	71.3	28.3	204	124.3	138.3	129.3
D12G1543	AT5G35370.1	S-locus lectin protein kinase family protein	6dpa_down	-1.05863	0.0100596	119.7	50	33.3	32	154.3	41.3	44	71.7
D12G1628	AT3G02940.1	myb domain protein 107	6dpa_down	-1.00367	1.03722e-11	772.7	212	144	199.7	944	328	431.3	428.7
D12G1629		No Annotation	6dpa_down	-1.20567	1.02252e-05	315.7	61.7	25.3	72.3	377.3	66.3	130.3	178.3
D12G1630	AT5G16770.2	myb domain protein 9	6dpa_down	-1.14404	2.77e-07	403.3	73	40.3	89	458.3	87	161	210.7
D12G2244	AT1G12780.1	UdP-d-glucose/UdP-d-galactose 4-epimerase 1	6dpa_down	-1.79673	9.8425e-05	458	143	107	86.3	425.3	132.7	156.7	320.7
D12G2327	AT5G24310.1	ABL interactor-like protein 3	6dpa_down	-1.42853	9.03192e-05	155.3	66	8.3	28	145	72.3	28	81
D12G2500	AT5G51970.2	GroES-like zinc-binding alcohol dehydrogenase family protein	6dpa_down	-2.25577	0.00446358	34.7	19.7	12.3	13.7	40.7	11.3	14.3	71
D12G2767	AT1G69490.1	NAC-like, activated by AP3/PI	6dpa_down	-4.4753	4.22273e-07	3	2.3	0.7	4.7	7	2	3.7	114.3
D13G0033	AT5G04870.1	calcium dependent protein kinase 1	6dpa_down	-9.95574	2.79739e-48	0	0.3	0	0	213.3	181	153.3	128.3
D13G0037	AT3G12390.1	Nascent polypeptide-associated complex (NAC), alpha subunit family protein	6dpa_down	-1.34433	8.39413e-10	61	114.7	109.3	85	149.7	267.3	243.3	231.7
D13G0060	AT2G40610.1	expansin A8	6dpa_down	-7.97246	2.6023e-96	5.3	4.3	1	1	11.3	50.7	90.7	302
D13G0142	AT1G06340.1	Plant Tudor-like protein	6dpa_down	-7.4458	4.74276e-29	0	0	0	0.3	0	5.7	51	85
D13G0174	AT2G40000.1	ortholog of sugar beet HS1 PRO-1 2	6dpa_down	-2.34411	2.17183e-05	72	35	35.7	37.7	71.3	37	35.3	204.7
D13G0199	AT2G29380.1	highly ABA-induced PP2C gene 3	6dpa_down	-1.29593	2.60056e-14	143.3	247.7	250	130.7	324	389.3	393.7	345.3
D13G0906	AT1G05260.1	Peroxidase superfamily protein	6dpa_down	-9.52274	1.92165e-18	0	0	0	0	1.3	0	0	93.7
D13G0976	AT3G51840.1	acyl-CoA oxidase 4	6dpa_down	-1.30968	8.75516e-05	94.3	46	70.7	142.7	126.3	40	104.7	378.3
D13G1562	AT5G53970.1	Tyrosine transaminase family protein	6dpa_down	-1.81758	0.000665265	49.3	40.3	35.3	76.7	93.3	29.3	50.3	291
D13G1609	AT1G78440.1	Arabidopsis thaliana gibberellin 2-oxidase 1	6dpa_down	-2.2099	0.000963977	8.3	54	82.3	207	33.7	44.7	108.7	1042.3
D13G1992	AT4G21390.1	S-locus lectin protein kinase family protein	6dpa_down	-1.3936	0.000379127	149.3	65.3	47	36.7	170.7	78.3	61	102.7
D13G2002		No Annotation	6dpa_down	-1.57886	6.25173e-07	466.3	162.3	26	32.7	485.3	176.3	46.3	105.3
D13G2016	AT5G11920.2	6-&1-fructan exohydrolase	6dpa_down	-1.18045	0.0127788	31.7	29	52.3	55.3	59.3	34.3	48.3	134.3
D13G2144	AT5G25560.4	CHY-type/CTCHY-type/RING-type Zinc finger protein	6dpa_down	-1.19897	2.64776e-05	5709	2996.7	2466.7	2376.7	7160.3	2844.7	3423.3	5831.3
D13G2222	AT3G13600.1	calmodulin-binding family protein	6dpa_down	-1.13172	0.000184671	0.3	9	105	50.3	0.3	6.7	66.3	118.3
Sca004857G01	AT4G17900.2	PLATZ transcription factor family protein	6dpa_down	-1.38213	0.0104744	179.7	61.3	54	79.3	219	51.7	81.7	222.3
Sca005179G01	AT1G78780.4	pathogenesis-related family protein	6dpa_down	-3.67773	3.01441e-05	2.7	3	1.3	9.3	15.7	2.3	2.7	131.3
Sca005244G01	AT3G16350.1	Homeodomain-like superfamily protein	6dpa_down	-1.83546	0.00467559	124.3	64	34.7	24.3	144	50	31.3	93.7
Sca005670G01	AT4G30996.1	Protein of unknown function (dUF1068)	6dpa_down	-1.00982	0.00360202	187	112.3	101	77	196.7	106.7	81.7	165.7
Sca018356G01		No Annotation	6dpa_down	-2.21175	0.000131081	13.3	12	10.3	22.7	29.7	8.3	16.7	113
Sca053338G01	AT3G26330.1	cytochrome P450, family 71, subfamily B, polypeptide 37	6dpa_down	-4.45418	1.59708e-07	1	0.3	0.7	3.7	3.3	1.3	4	88.7
Top three up- or down-regulated genes at each time point are highlighted in green.
